# Supplementary material for: Organocatalytic enantioselective aza-Friedel–Crafts alkylation of β-naphthols and isatin-derived ketimines via a Takemoto-type catalyst
Source: Royal Society of Chemistry journal article supplement (doi:10.1039/d1nj01421h), 2021-01-01
Supplement: d1nj01421h1.pdf [file d1nj01421h1.pdf]

# Supporting Information

## Organocatalytic Enantioselective *aza*-Friedel-Crafts Alkylation of $\beta$ -Naphthols and Isatin-Derived Ketimines via Takemoto- Type Catalyst

Zhe Chen<sup>a,b</sup>, Tianyi Zhang<sup>a</sup>, Yuhong Sun<sup>a</sup>, Liming Wang<sup>a\*</sup>, Ying Jin<sup>a\*</sup>

<sup>a</sup>*Department of Pharmacy, Jilin Medical University, Jilin, Jilin 132013, China*

<sup>b</sup>*Department of Pharmacy, Yanbian University, Yanji, Jilin 133000, China)*

|                                                         |         |
|---------------------------------------------------------|---------|
| <sup>1</sup> H NMR and <sup>13</sup> C NMR spectra..... | S2-S19  |
| HPLC trace.....                                         | S20-S42 |



<sup>1</sup>H NMR of 4c

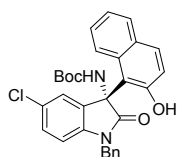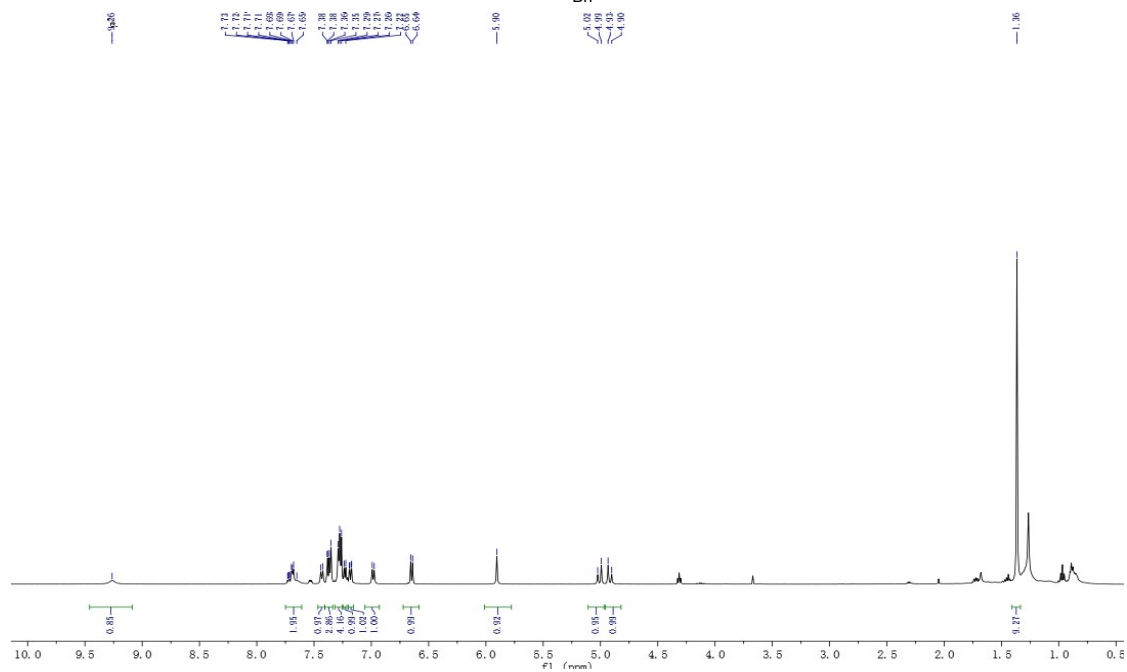

<sup>1</sup>H NMR of 4d

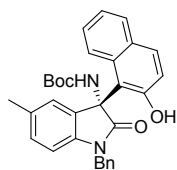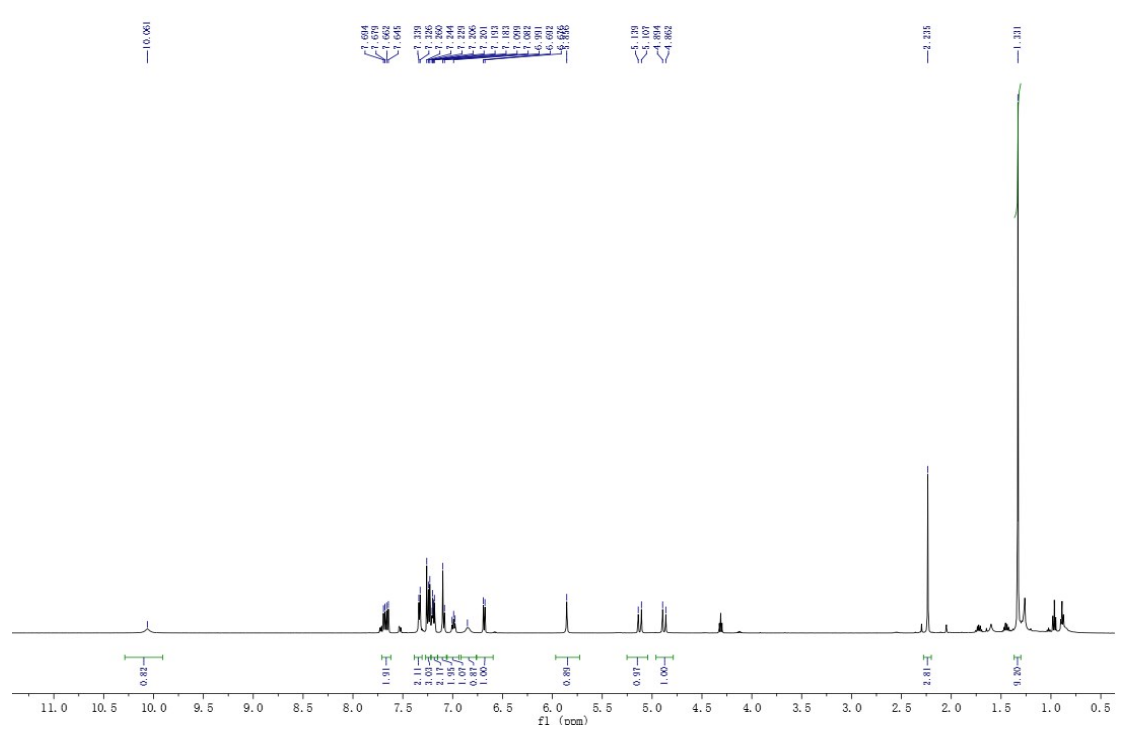



### <sup>1</sup>H NMR of 4f

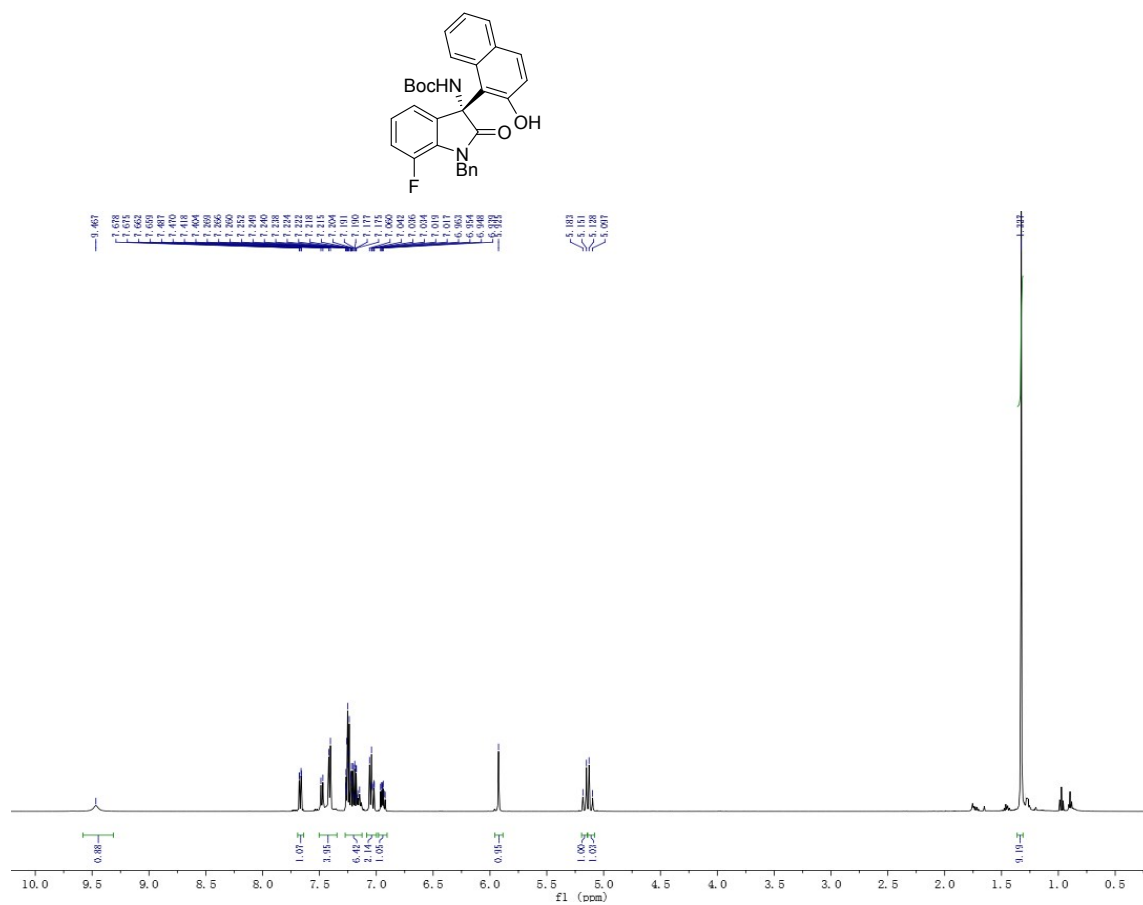

### <sup>13</sup>C NMR of 4f

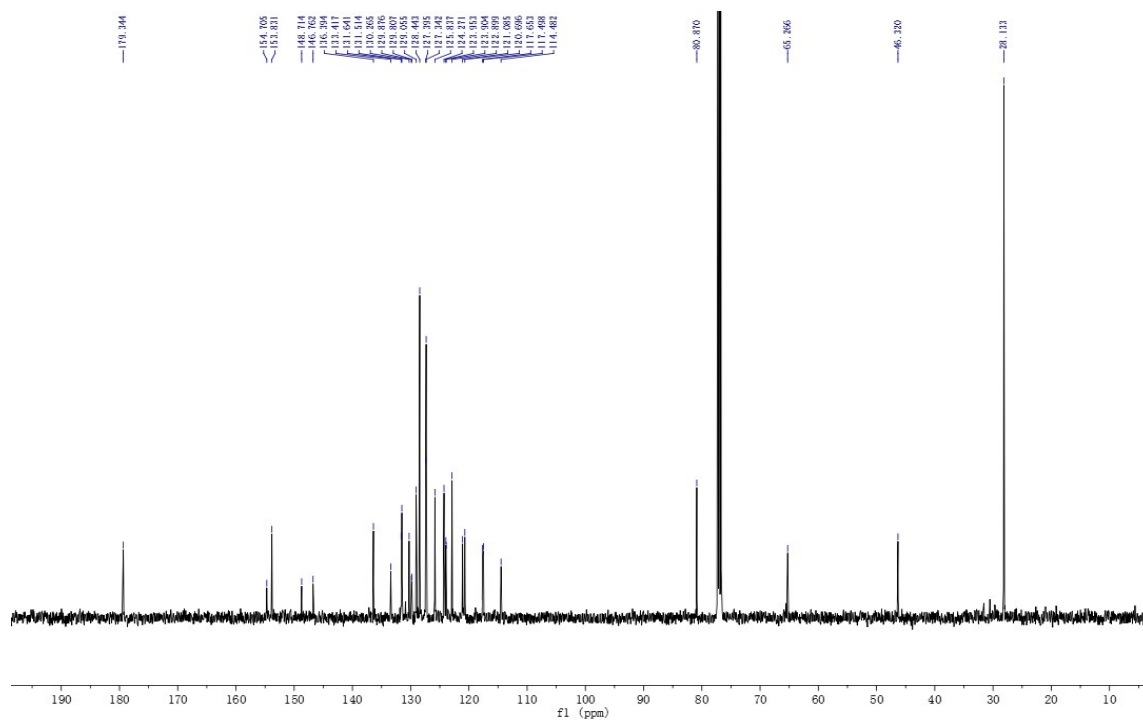

### <sup>1</sup>H NMR of 4g

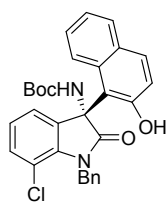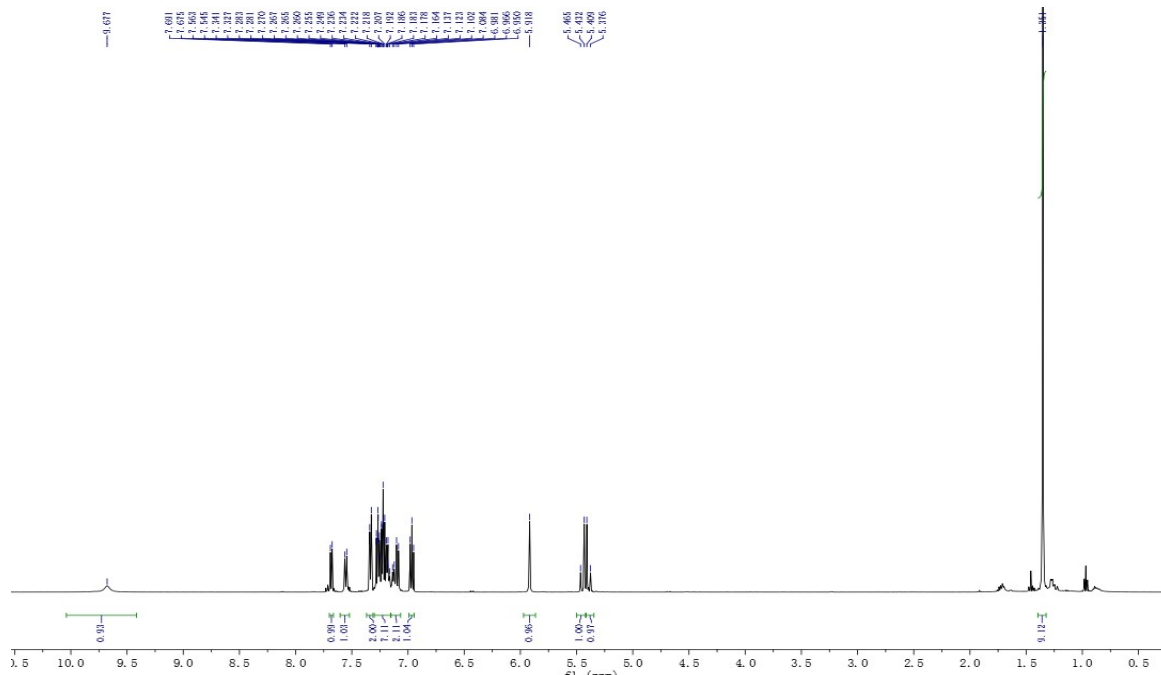

### <sup>13</sup>C NMR of 4g

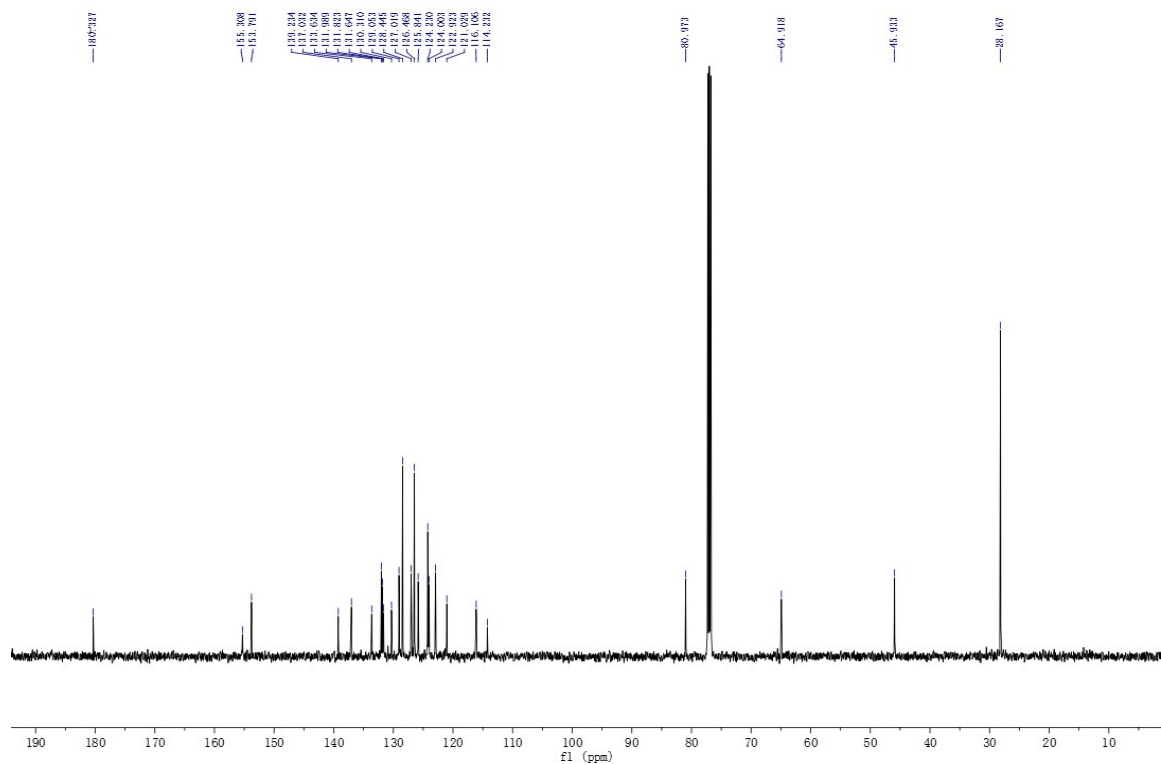







<sup>1</sup>H NMR of **4k**

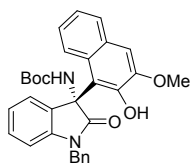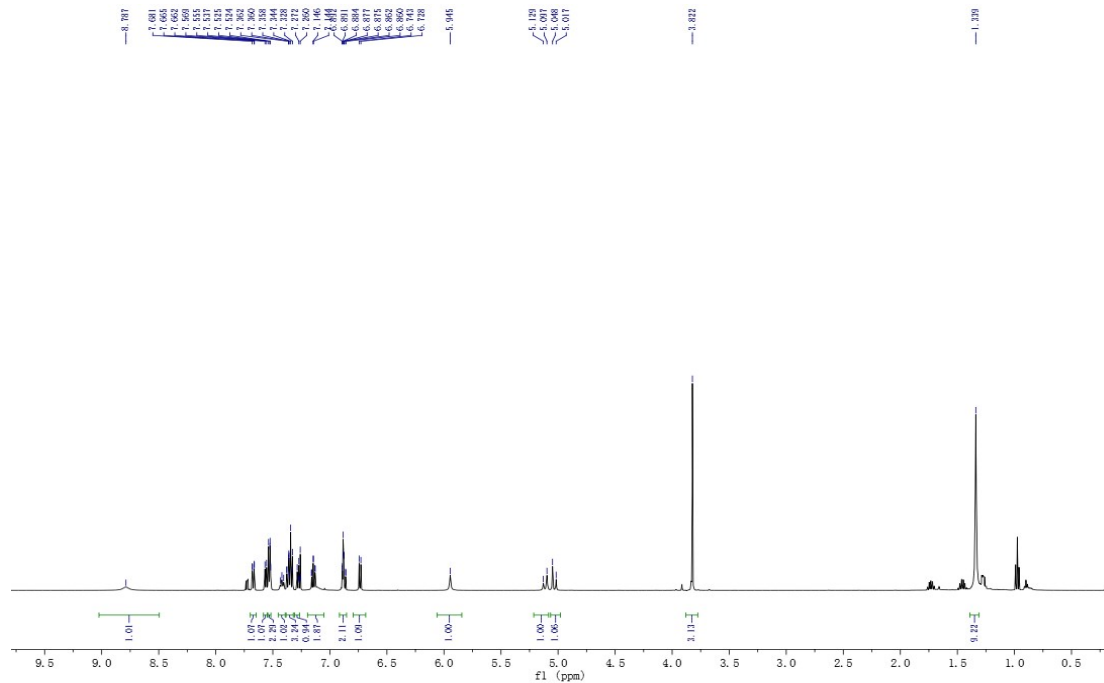

<sup>1</sup>H NMR of **4l**

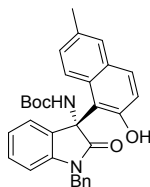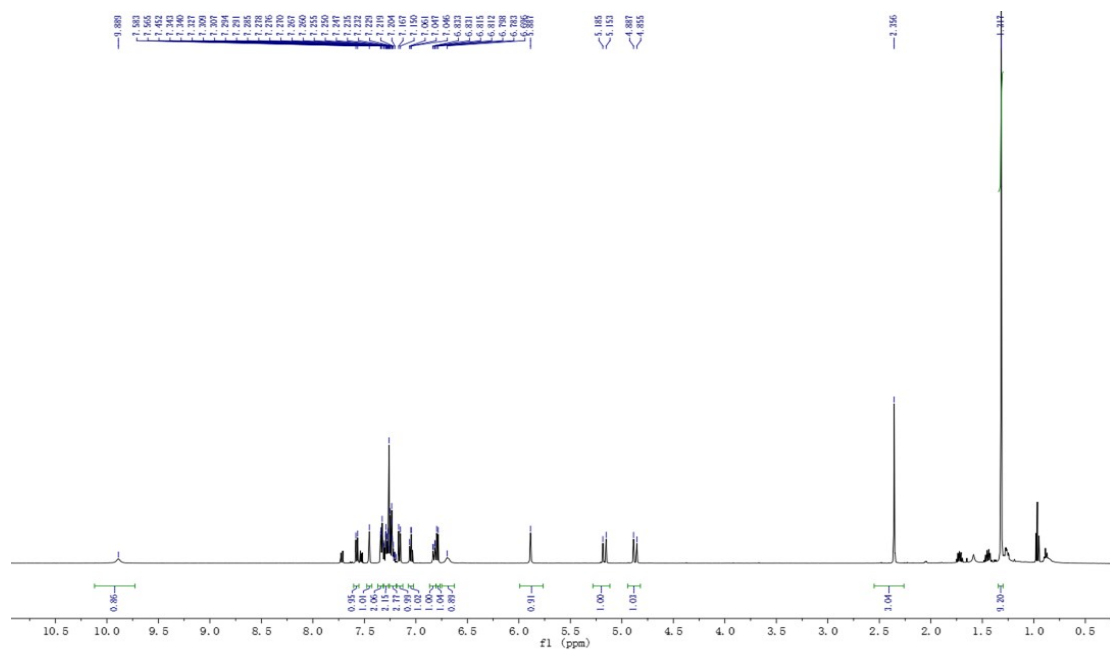

<sup>13</sup>C NMR of 4l

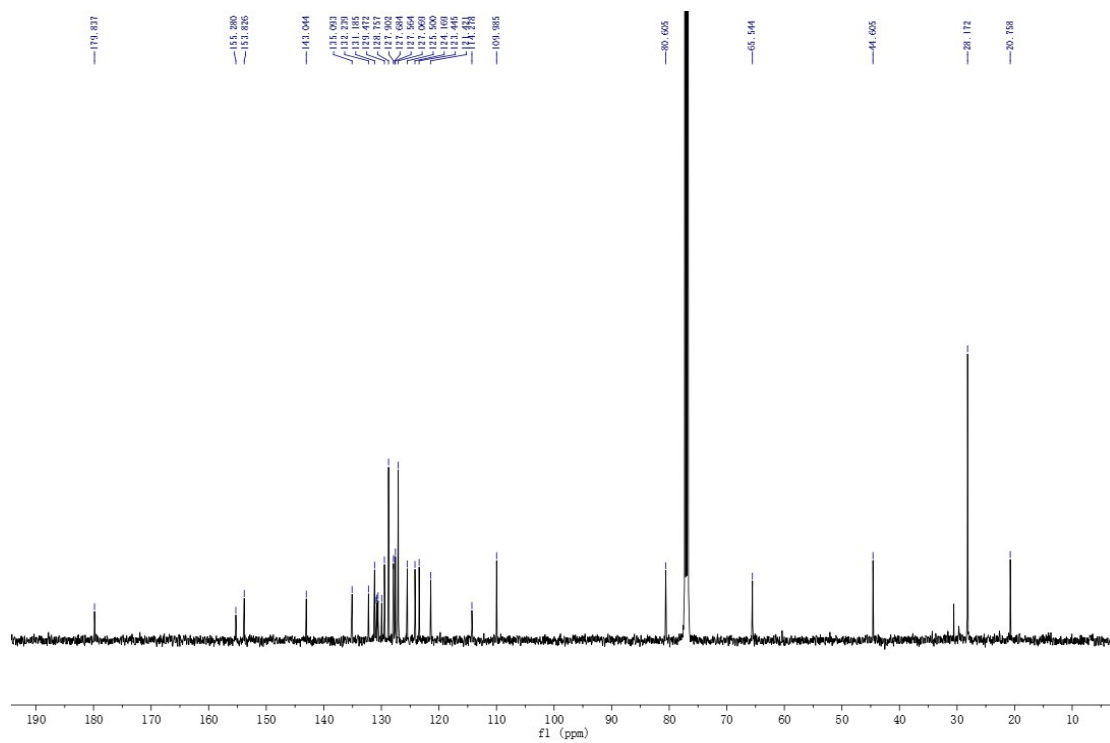

<sup>1</sup>H NMR of 4m

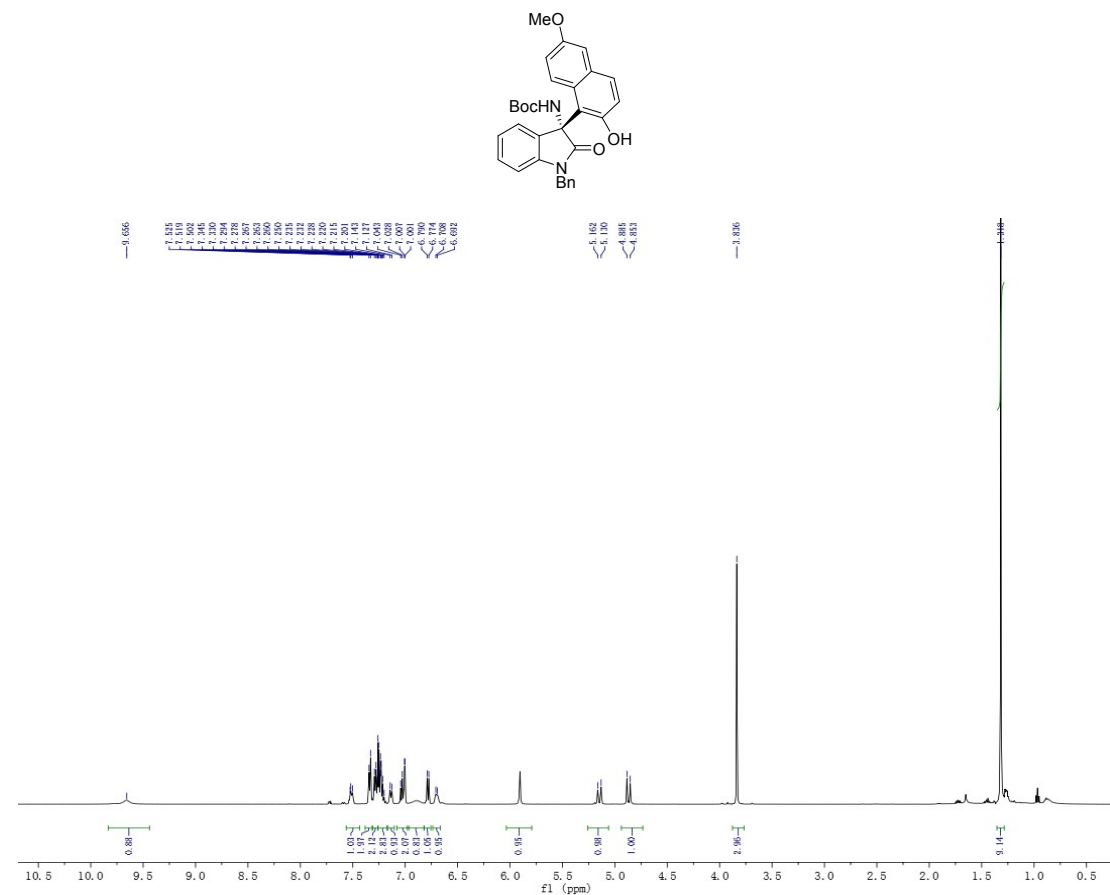



### <sup>1</sup>H NMR of 4p

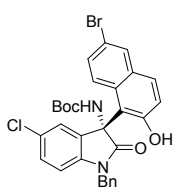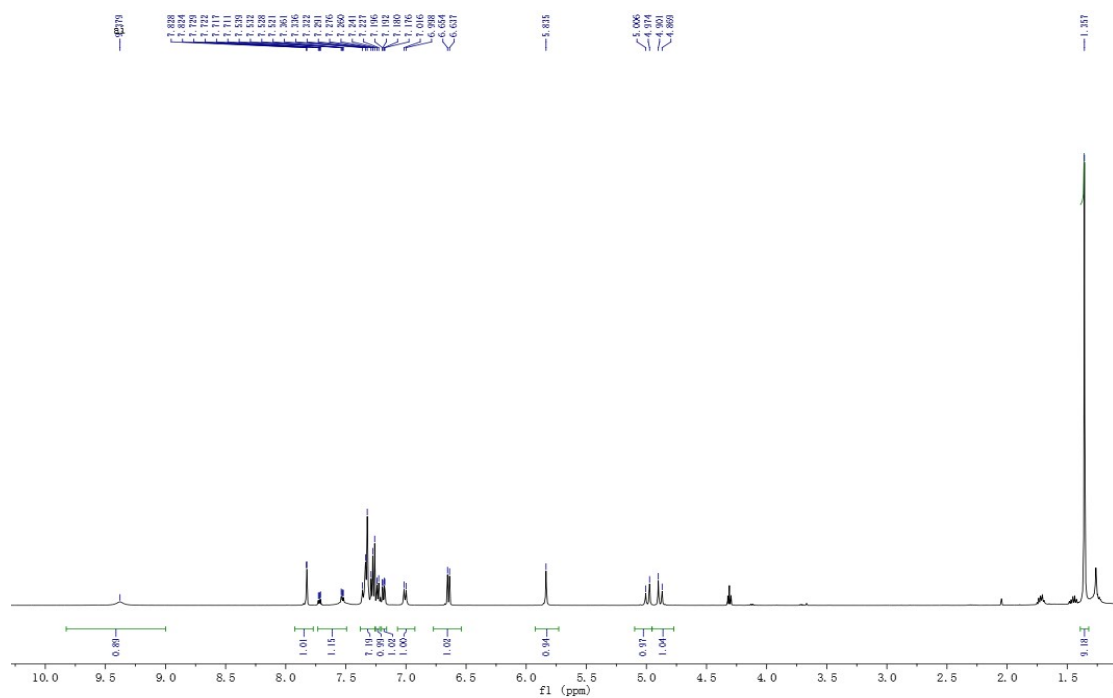

### <sup>13</sup>C NMR of 4p

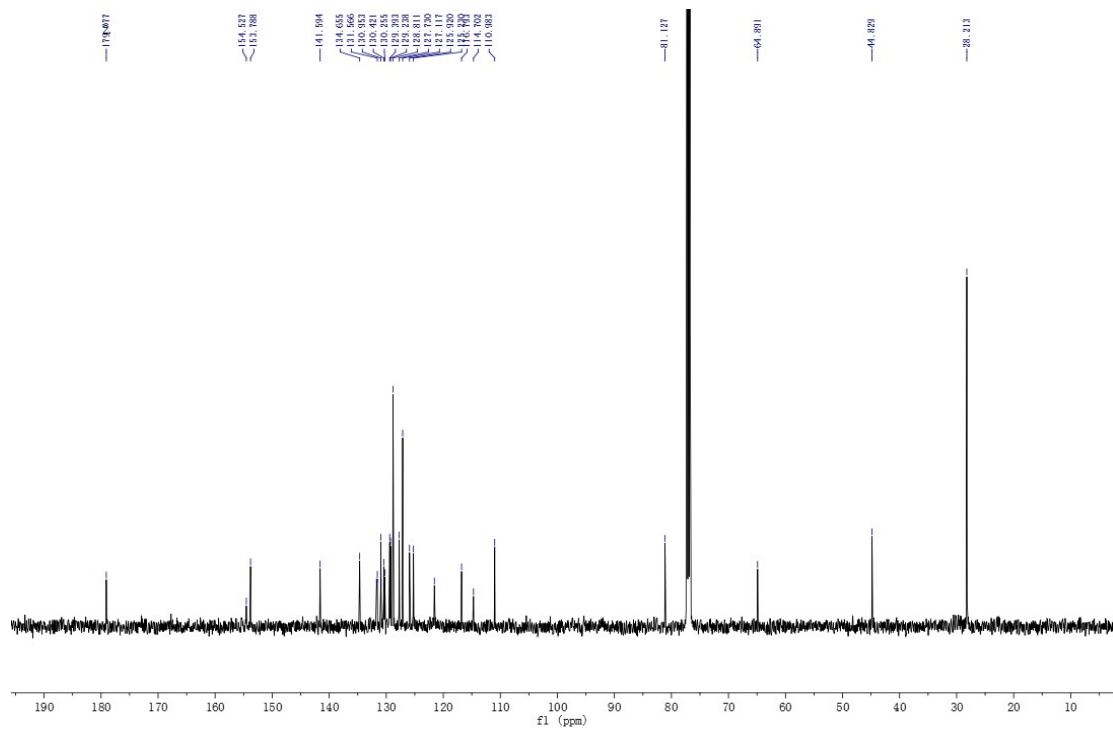

### <sup>1</sup>H NMR of 4q

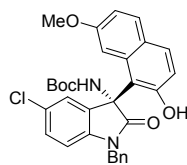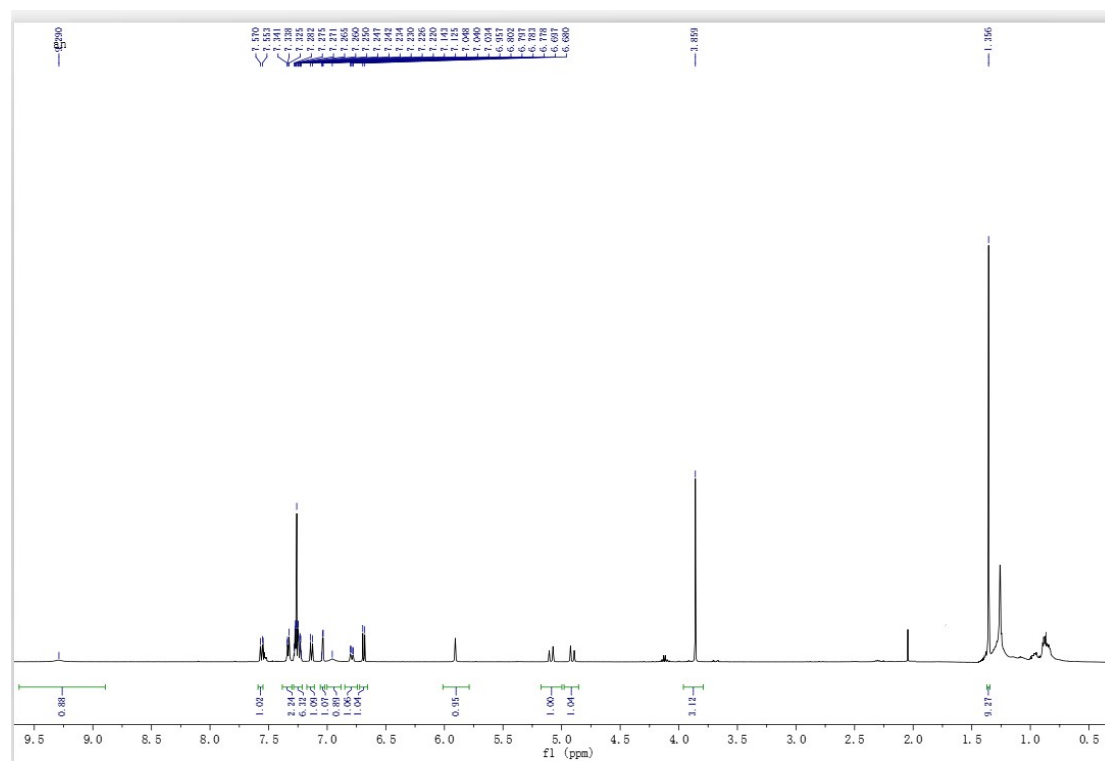

### <sup>13</sup>C NMR of 4q

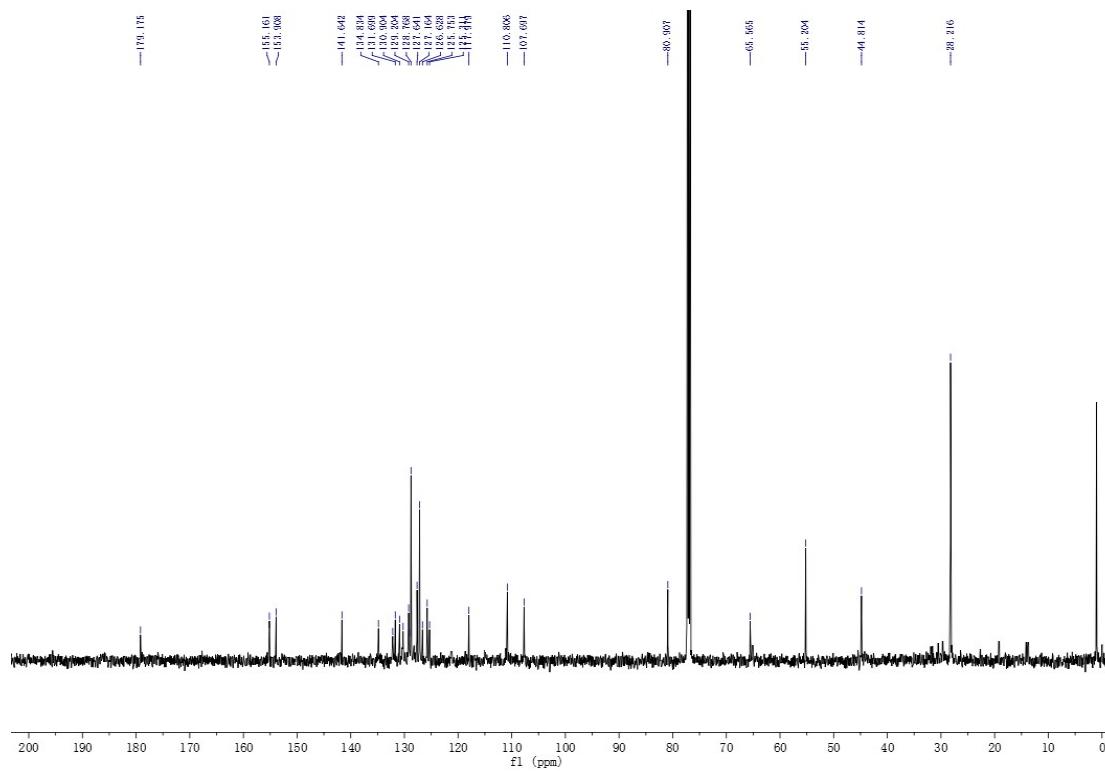

<sup>1</sup>H NMR of **4r**

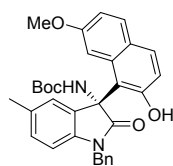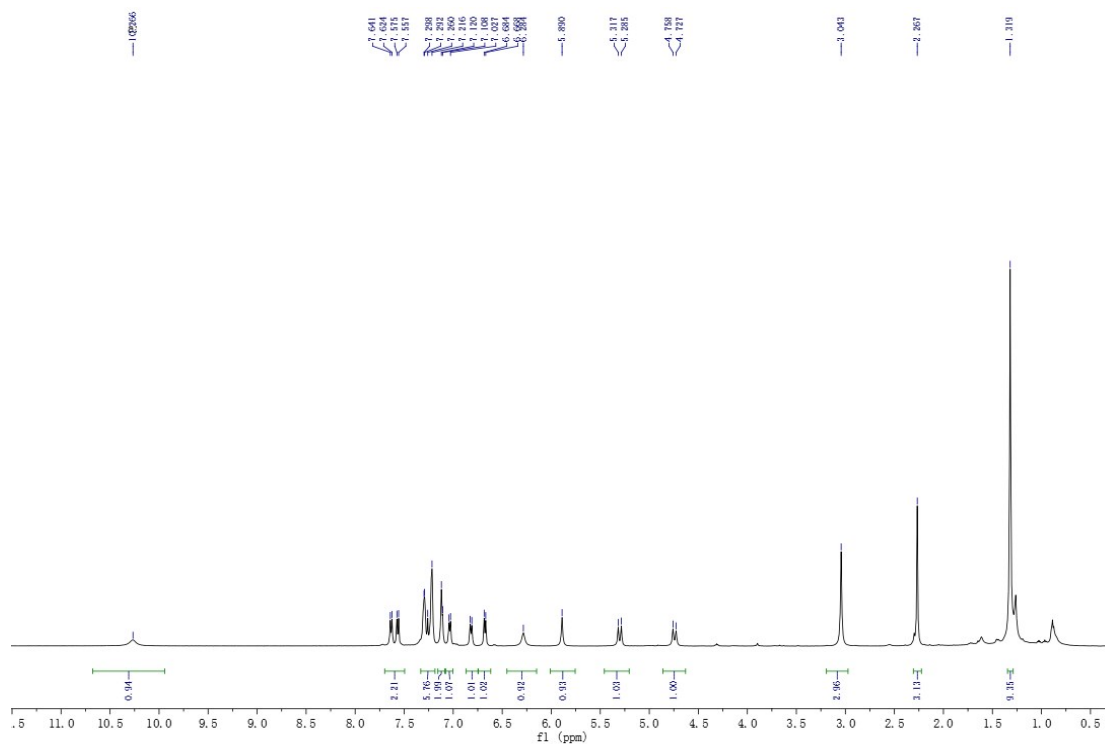

<sup>13</sup>C NMR of **4r**

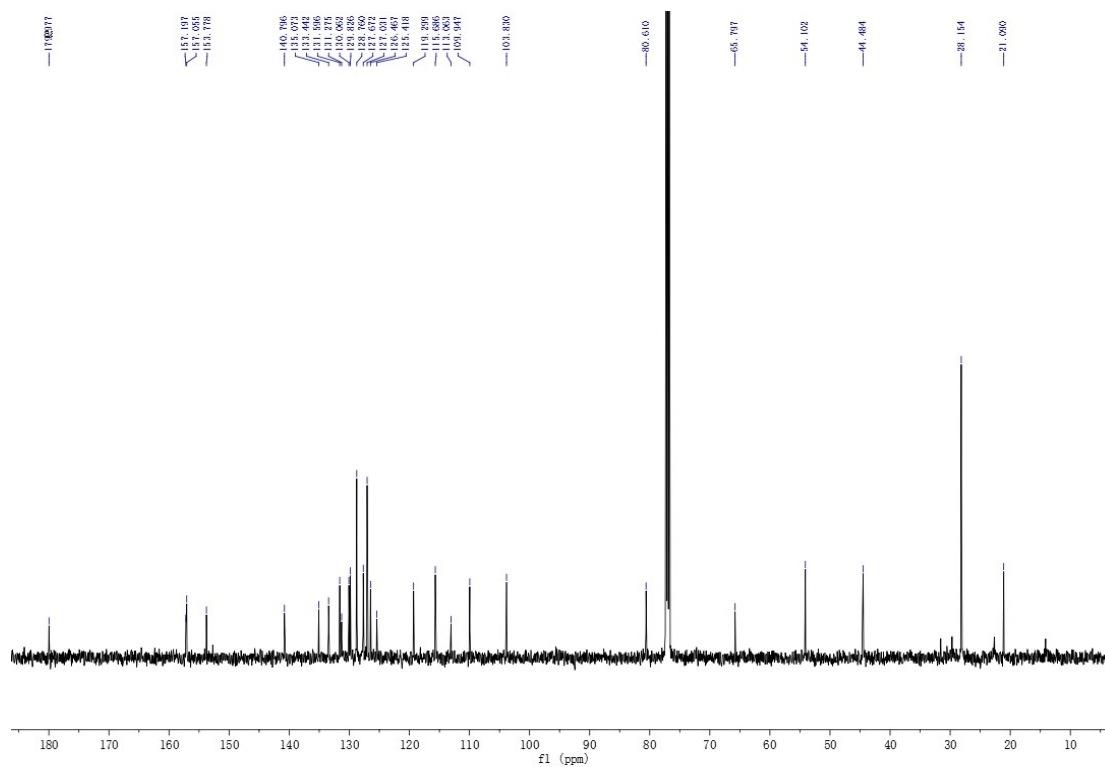







### <sup>1</sup>H NMR of 4u

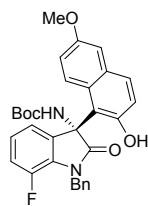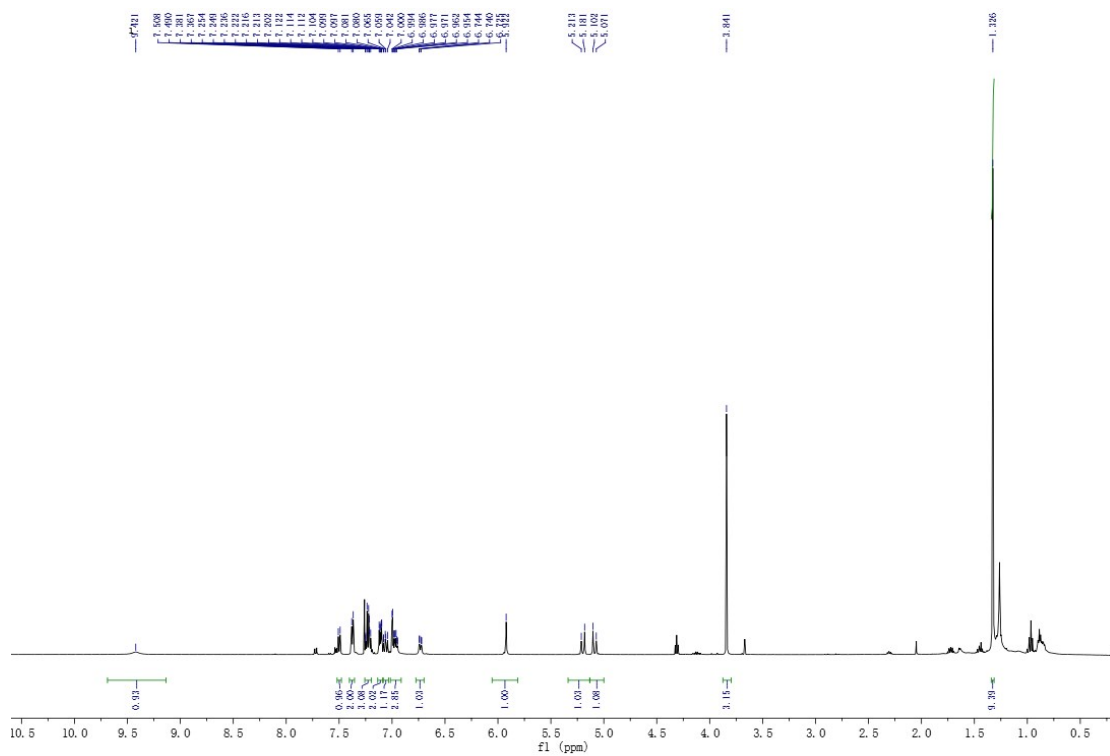

### <sup>13</sup>C NMR of 4u

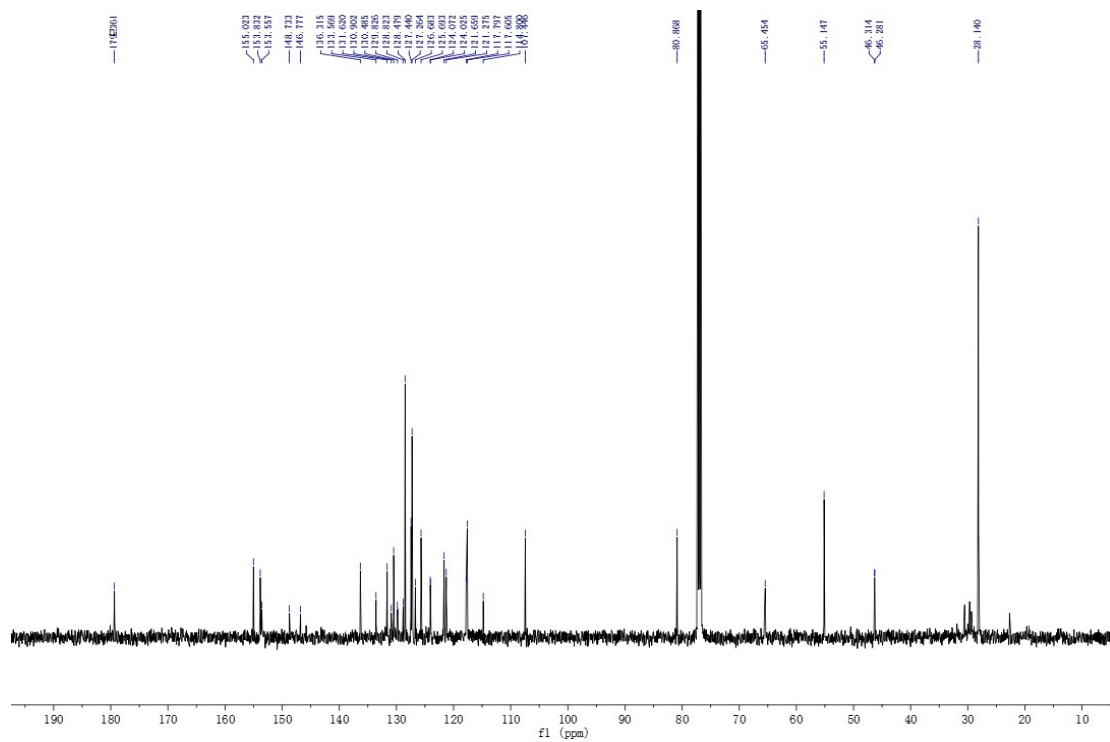

# <sup>1</sup>H NMR of 4v

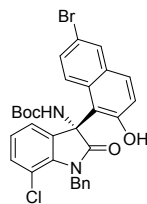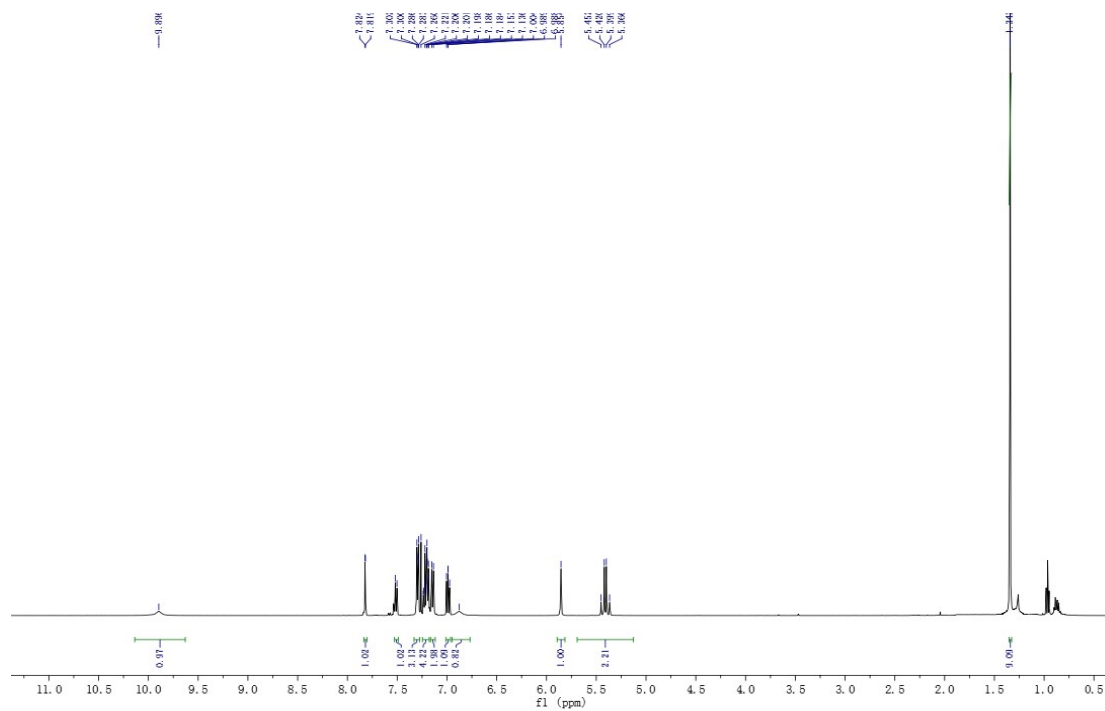

# <sup>13</sup>C NMR of 4v

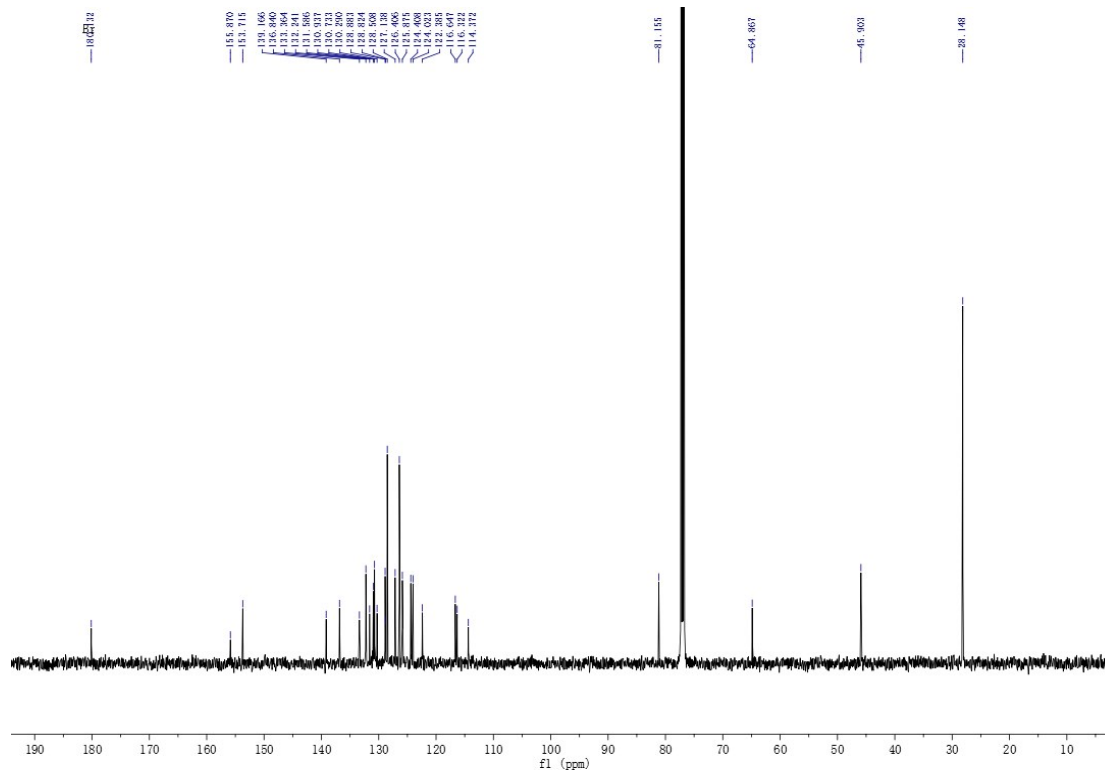

# <sup>1</sup>H NMR of 4w

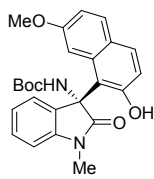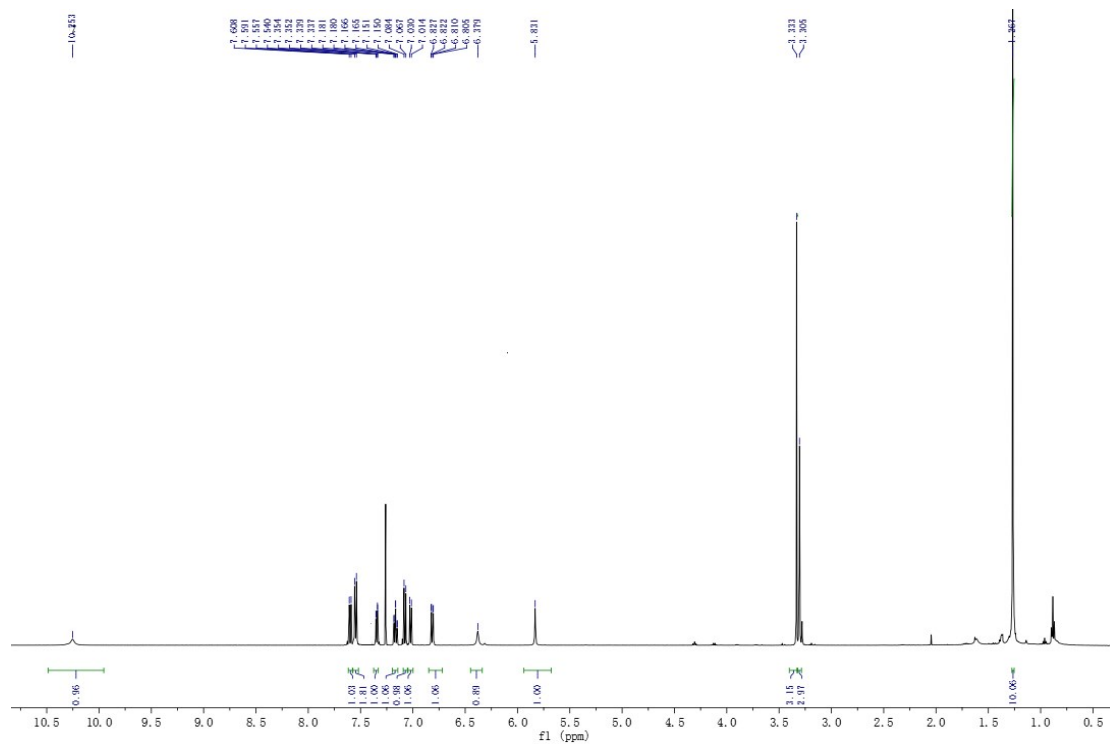

# <sup>13</sup>C NMR of 4w

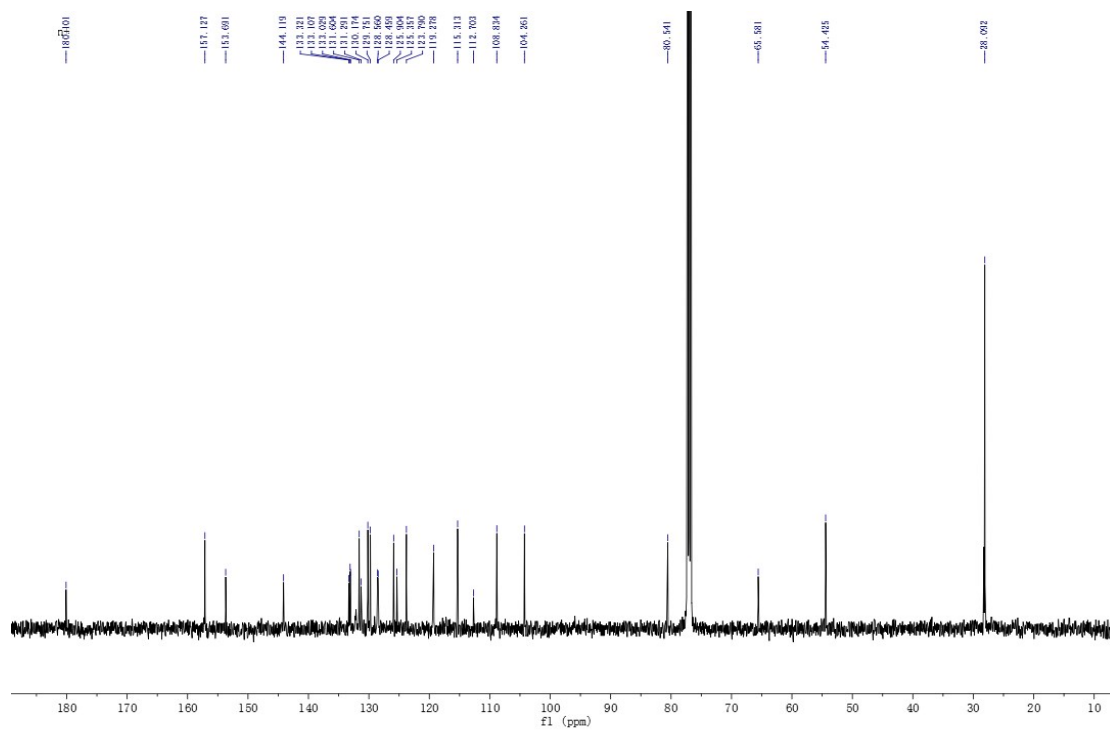

# HPLC trace

## 4a-racemic

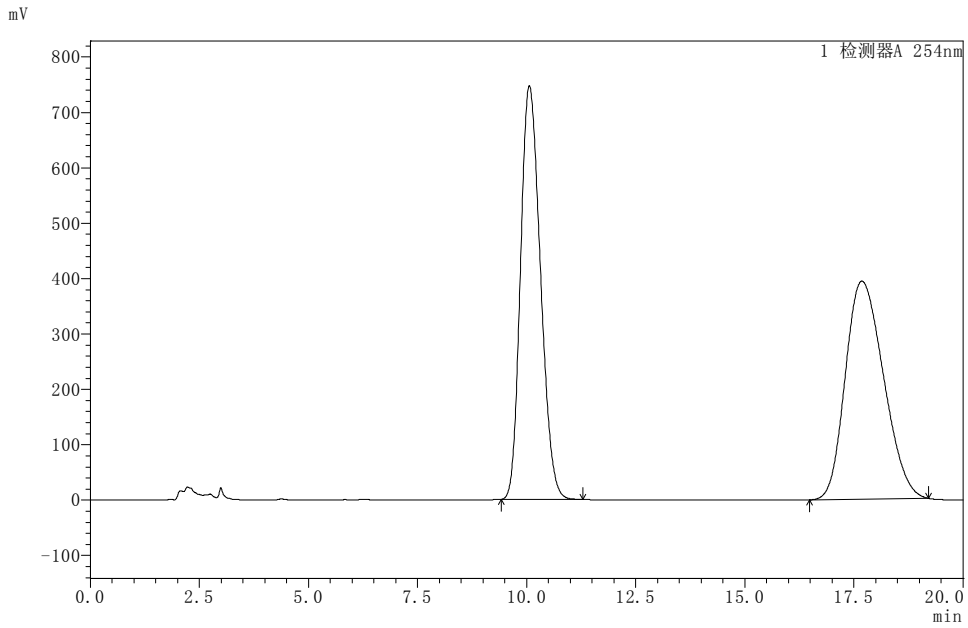

|       | Retention time | Area     | Height  | Area%   |
|-------|----------------|----------|---------|---------|
| 1     | 10.064         | 23754816 | 746927  | 49.750  |
| 2     | 17.686         | 23993670 | 393904  | 50.250  |
| Total |                | 47748486 | 1140831 | 100.000 |

## 4a

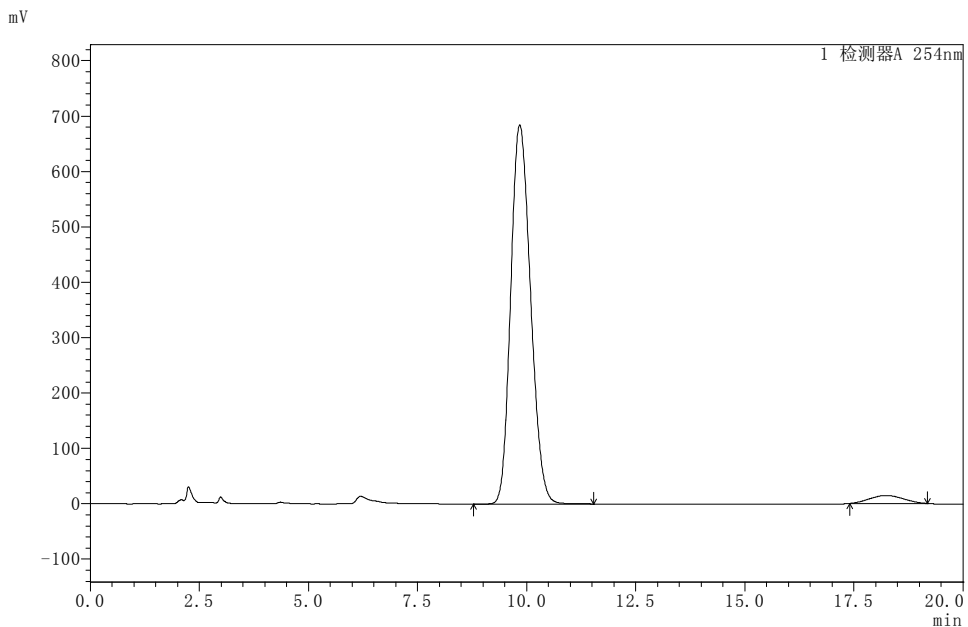

|       | Retention time | Area     | Height | Area%   |
|-------|----------------|----------|--------|---------|
| 1     | 9.844          | 21634839 | 684388 | 96.537  |
| 2     | 18.241         | 776198   | 14468  | 3.463   |
| Total |                | 22411037 | 698856 | 100.000 |

**4b-racemic**

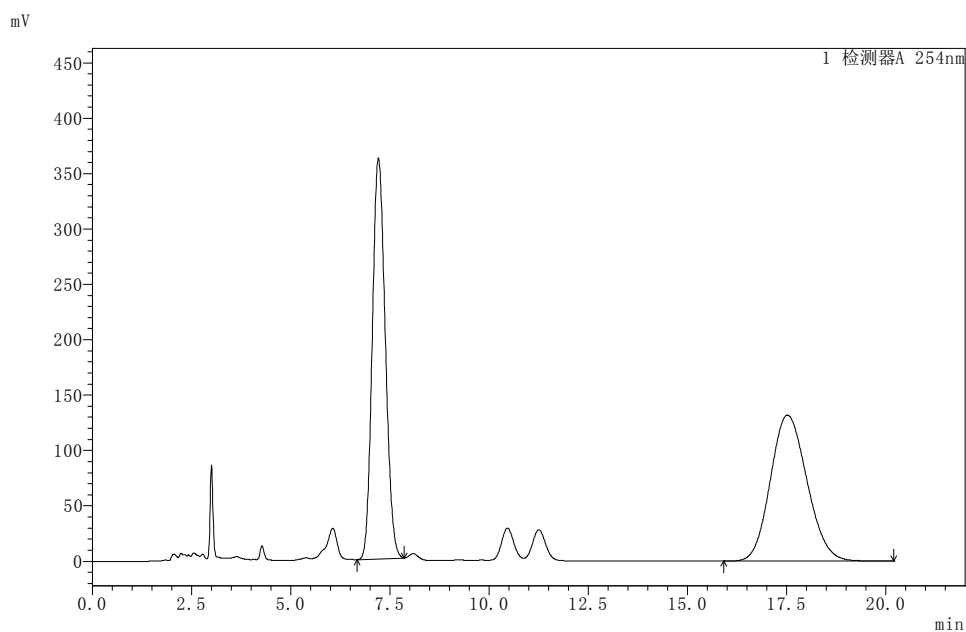

|       | Retention time | Area     | Height | Area%   |
|-------|----------------|----------|--------|---------|
| 1     | 7.215          | 8260935  | 362186 | 49.382  |
| 2     | 17.528         | 8467705  | 131867 | 50.618  |
| Total |                | 16728640 | 494054 | 100.000 |

**4b**

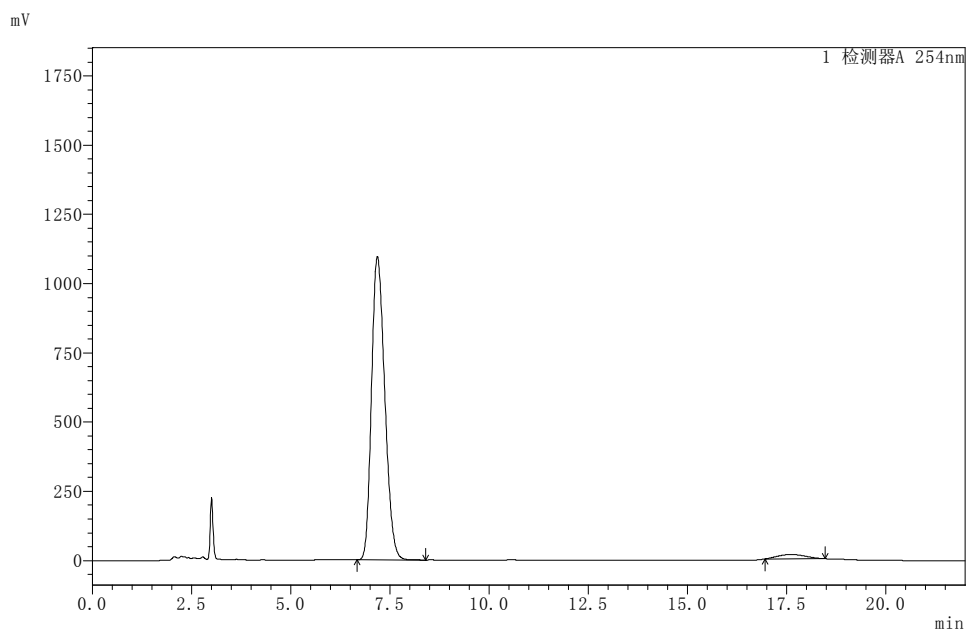

|       | Retention time | Area     | Height  | Area%   |
|-------|----------------|----------|---------|---------|
| 1     | 7.189          | 25493912 | 1095440 | 97.057  |
| 2     | 17.618         | 772934   | 15822   | 2.943   |
| Total |                | 26266847 | 1111261 | 100.000 |

**4c-racemic**

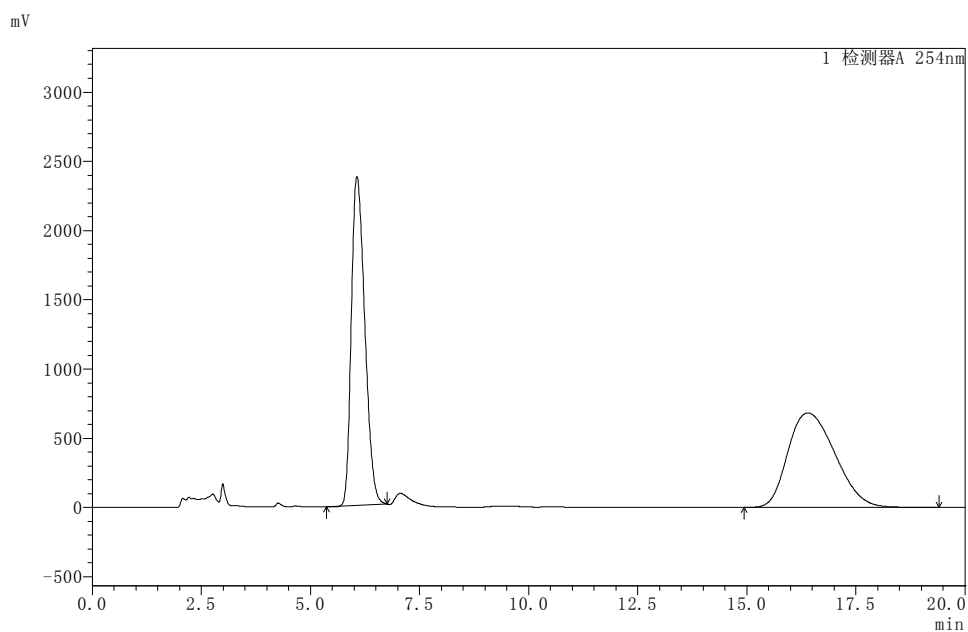

|       | Retention time | Area      | Height  | Area%   |
|-------|----------------|-----------|---------|---------|
| 1     | 6.068          | 51173493  | 2376374 | 49.938  |
| 2     | 16.401         | 51300320  | 682096  | 50.062  |
| Total |                | 102473813 | 3058470 | 100.000 |

**4c**

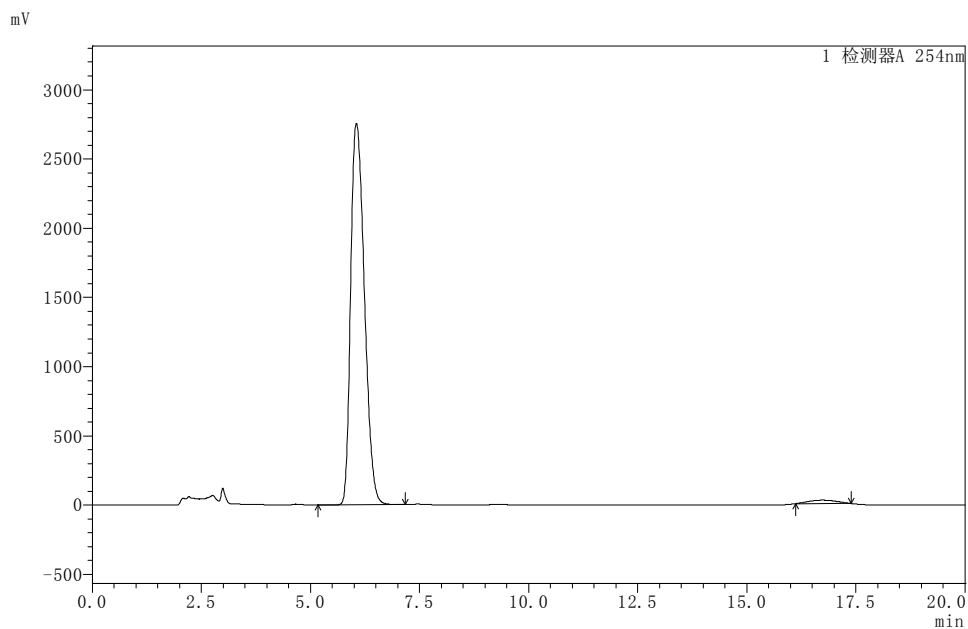

|       | Retention time | Area     | Height  | Area%   |
|-------|----------------|----------|---------|---------|
| 1     | 6.055          | 60166576 | 2754601 | 98.195  |
| 2     | 16.738         | 1106054  | 24699   | 1.805   |
| Total |                | 61272630 | 2779300 | 100.000 |

**4d-racemic**

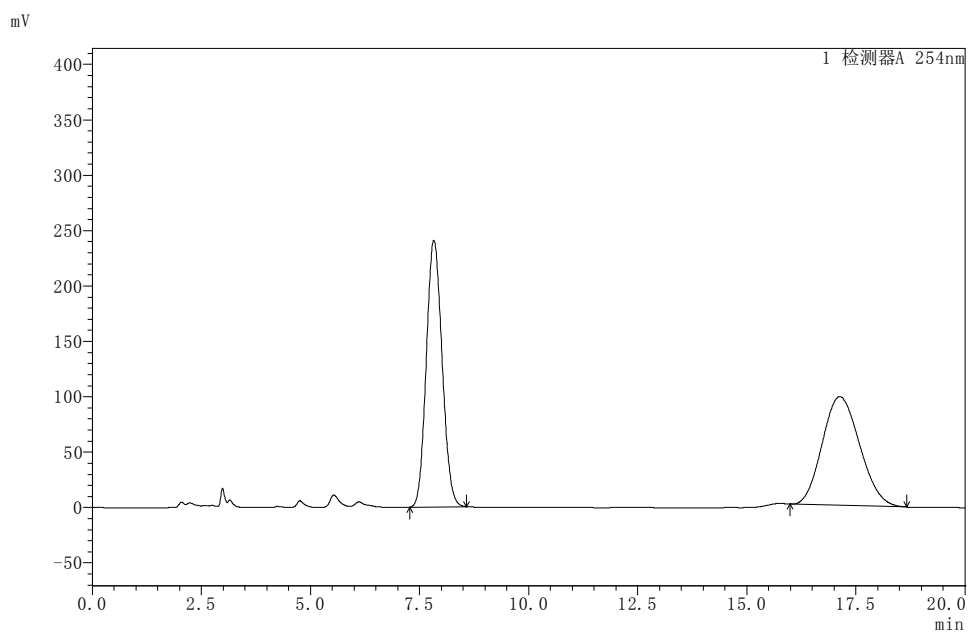

|       | Retention time | Area     | Height | Area%   |
|-------|----------------|----------|--------|---------|
| 1     | 7.830          | 6062370  | 240895 | 50.809  |
| 2     | 17.133         | 5869339  | 98224  | 49.191  |
| Total |                | 11931709 | 339119 | 100.000 |

**4d**

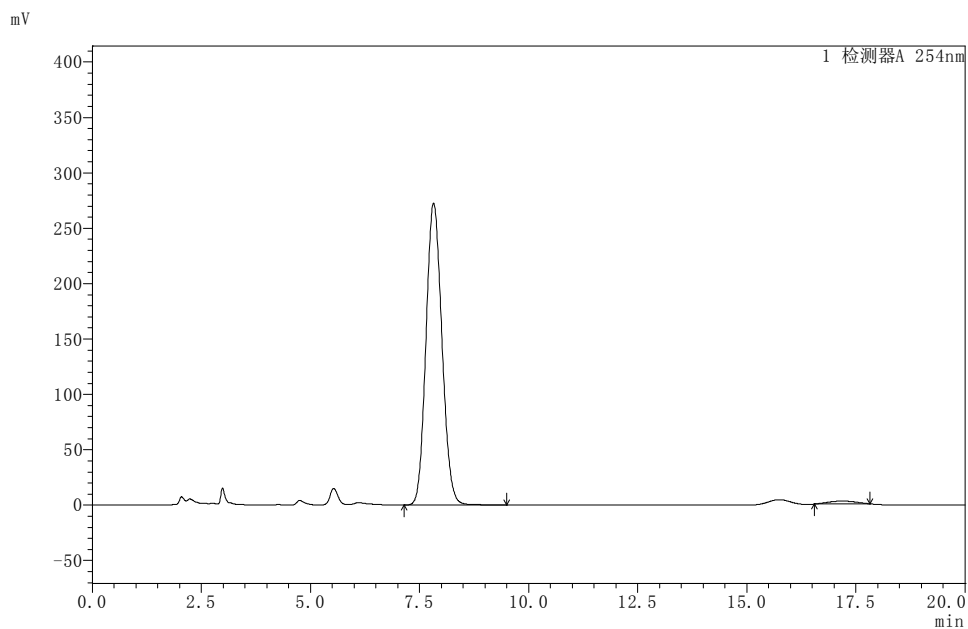

|       | Retention time | Area    | Height | Area%   |
|-------|----------------|---------|--------|---------|
| 1     | 7.823          | 6940496 | 272535 | 98.691  |
| 2     | 17.186         | 92056   | 2561   | 1.309   |
| Total |                | 7032552 | 275096 | 100.000 |

**4e-racemic**

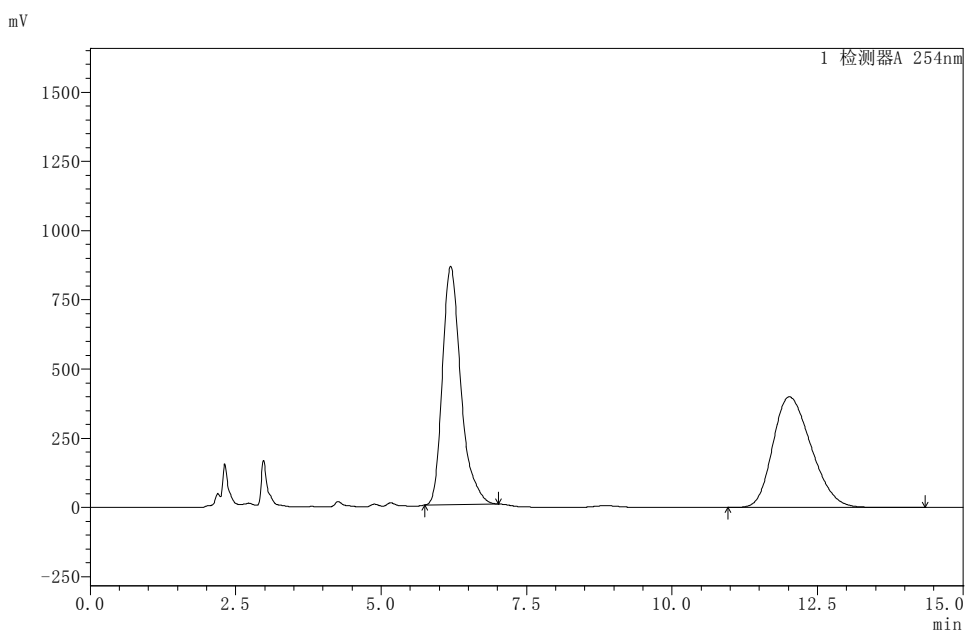

|       | Retention time | Area     | Height  | Area%   |
|-------|----------------|----------|---------|---------|
| 1     | 6.196          | 19017583 | 859909  | 50.956  |
| 2     | 12.018         | 18303693 | 399619  | 49.044  |
| Total |                | 37321276 | 1259528 | 100.000 |

**4e**

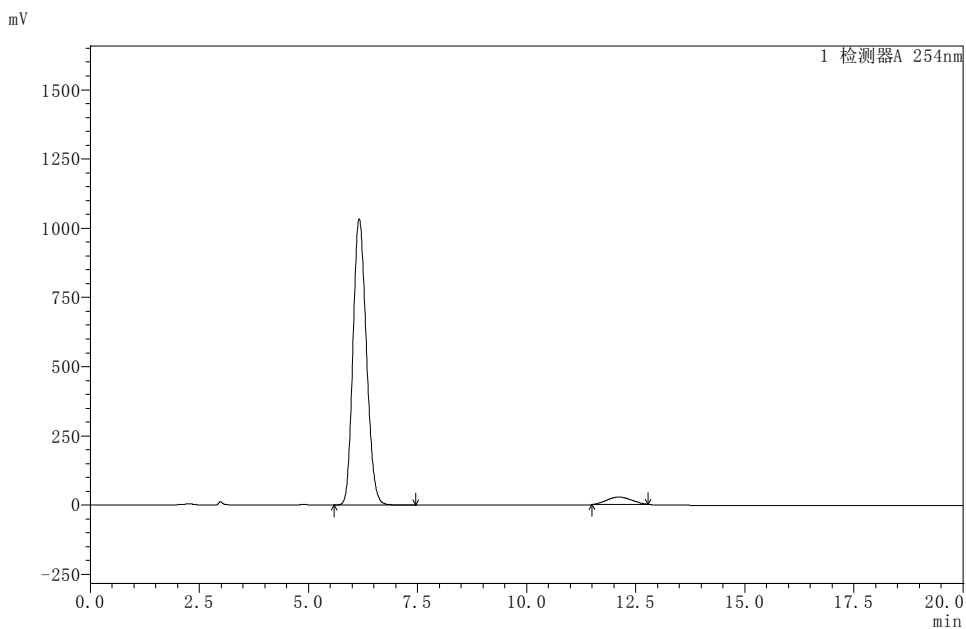

|       | Retention time | Area     | Height  | Area%   |
|-------|----------------|----------|---------|---------|
| 1     | 6.164          | 22144341 | 1033873 | 95.461  |
| 2     | 12.116         | 1052949  | 26724   | 4.539   |
| Total |                | 23197290 | 1060596 | 100.000 |



**4f-racemic**

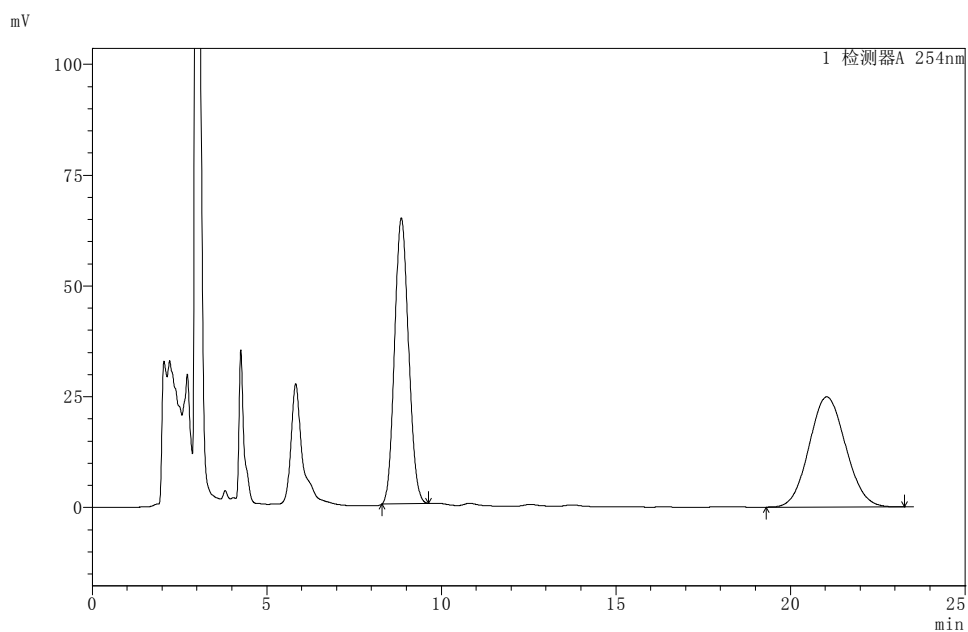

|       | Retention time | Area    | Height | Area%   |
|-------|----------------|---------|--------|---------|
| 1     | 8.855          | 1803520 | 64533  | 49.865  |
| 2     | 21.044         | 1813295 | 24881  | 50.135  |
| Total |                | 3616815 | 89414  | 100.000 |

**4f**

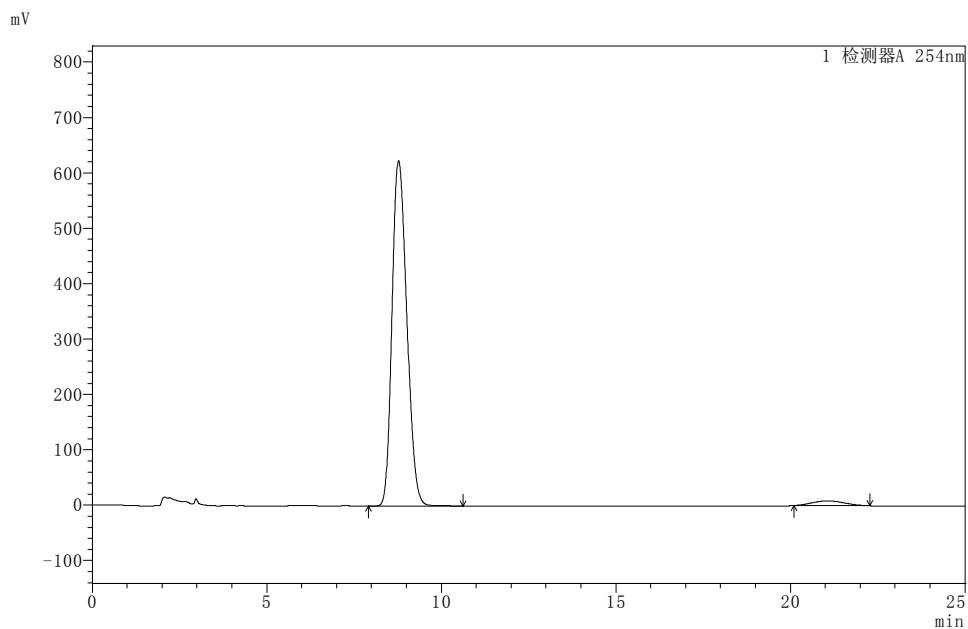

|       | Retention time | Area     | Height | Area%   |
|-------|----------------|----------|--------|---------|
| 1     | 8.777          | 18393941 | 623390 | 97.070  |
| 2     | 21.070         | 555127   | 8496   | 2.930   |
| Total |                | 18949068 | 631887 | 100.000 |

### 4g-racemic

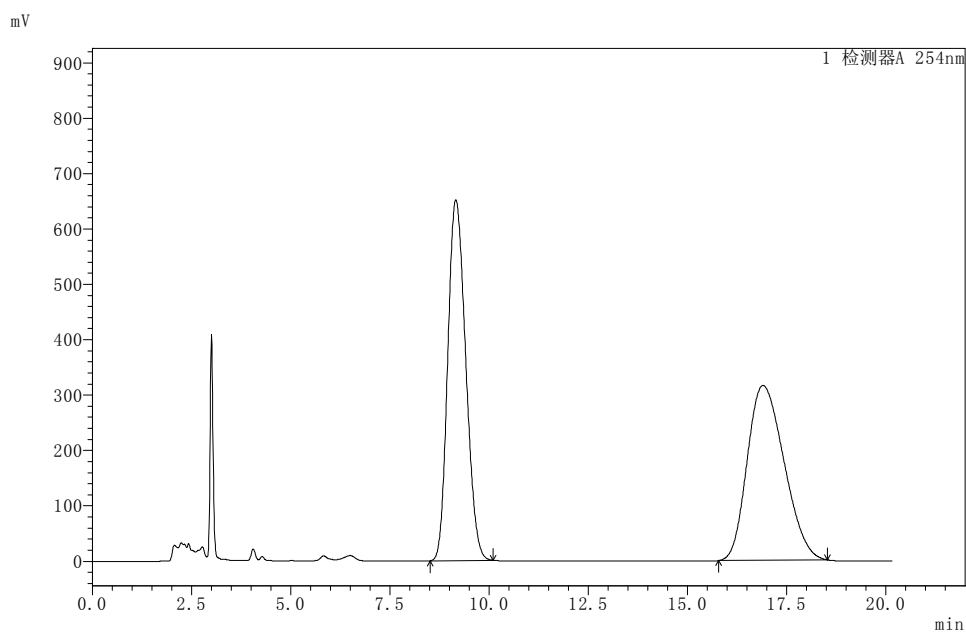

|       | Retention time | Area     | Height | Area%   |
|-------|----------------|----------|--------|---------|
| 1     | 9.167          | 20500754 | 651248 | 50.095  |
| 2     | 16.912         | 20422928 | 315700 | 49.905  |
| Total |                | 40923682 | 966948 | 100.000 |

### 4g

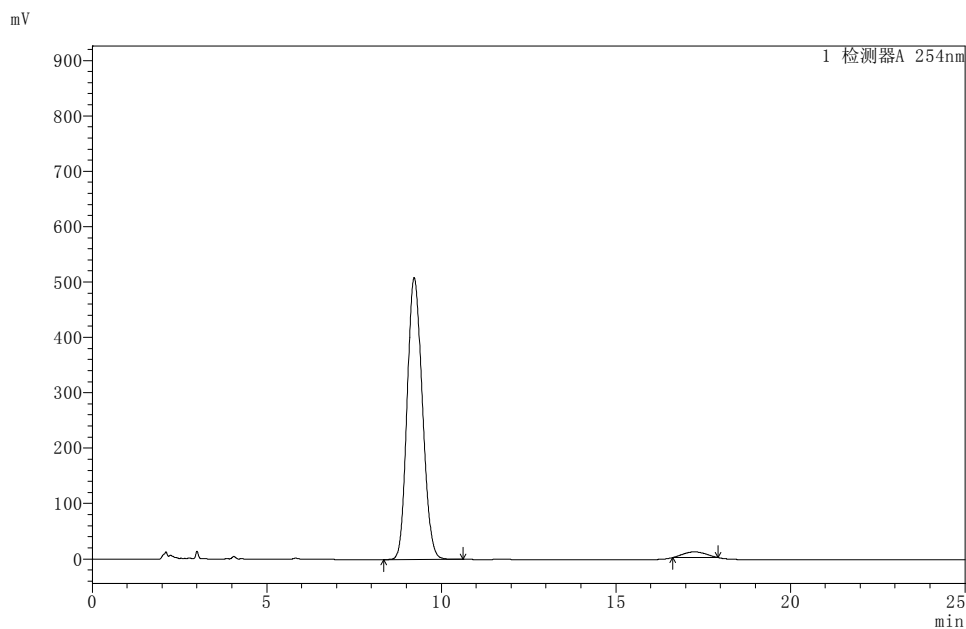

|       | Retention time | Area     | Height | Area%   |
|-------|----------------|----------|--------|---------|
| 1     | 9.224          | 15640424 | 509037 | 97.074  |
| 2     | 17.254         | 471413   | 12514  | 2.926   |
| Total |                | 16111837 | 521551 | 100.000 |

### 4h-racemic

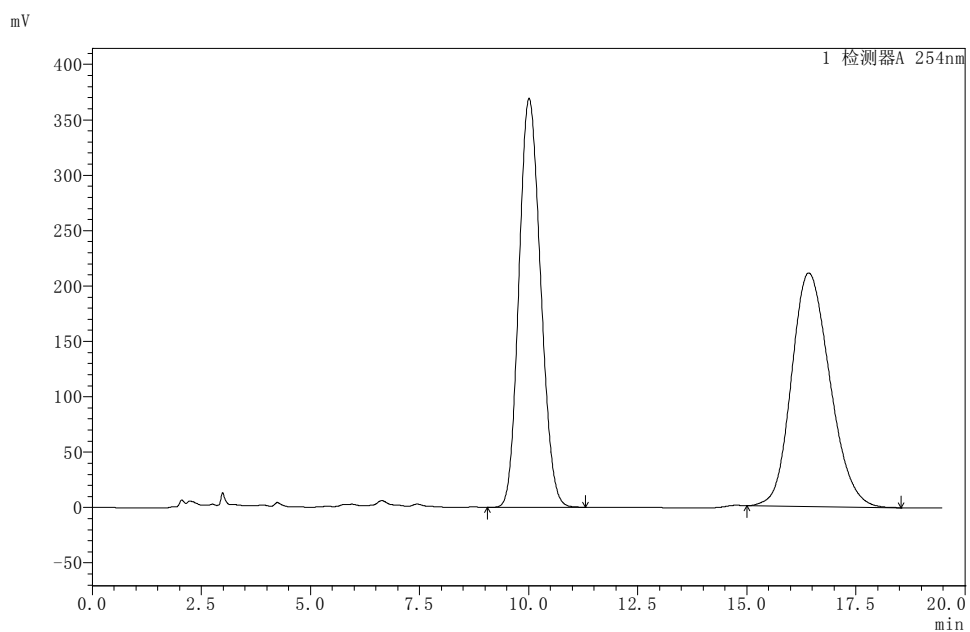

|       | Retention time | Area     | Height | Area%   |
|-------|----------------|----------|--------|---------|
| 1     | 10.012         | 12758180 | 369165 | 49.718  |
| 2     | 16.422         | 12902679 | 211012 | 50.282  |
| Total |                | 25660859 | 580176 | 100.000 |

### 4h

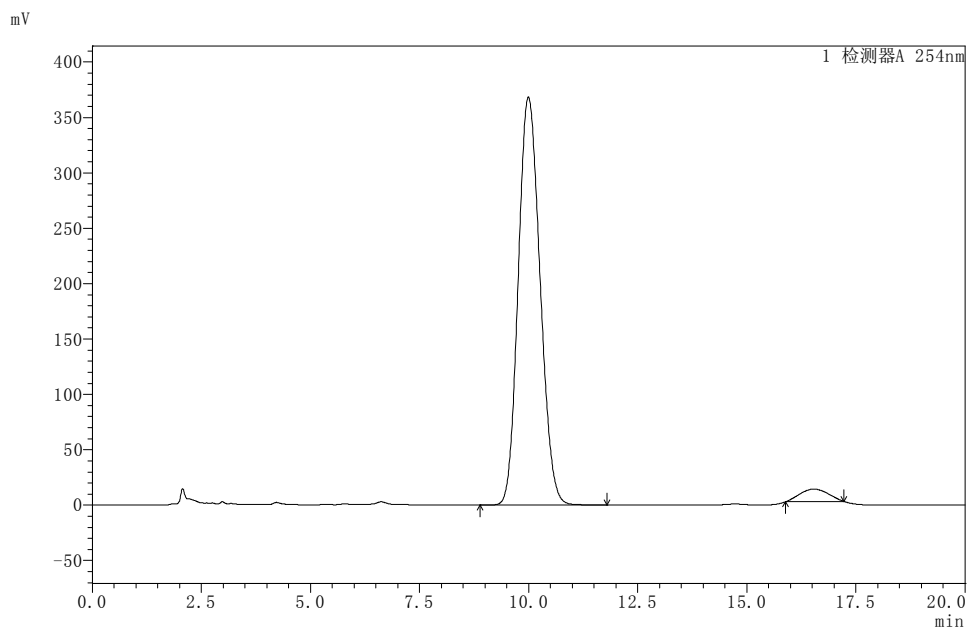

|       | Retention time | Area     | Height | Area%   |
|-------|----------------|----------|--------|---------|
| 1     | 9.996          | 12813961 | 368444 | 96.138  |
| 2     | 16.542         | 514739   | 11336  | 3.862   |
| Total |                | 13328701 | 379780 | 100.000 |

**4i-racemic**

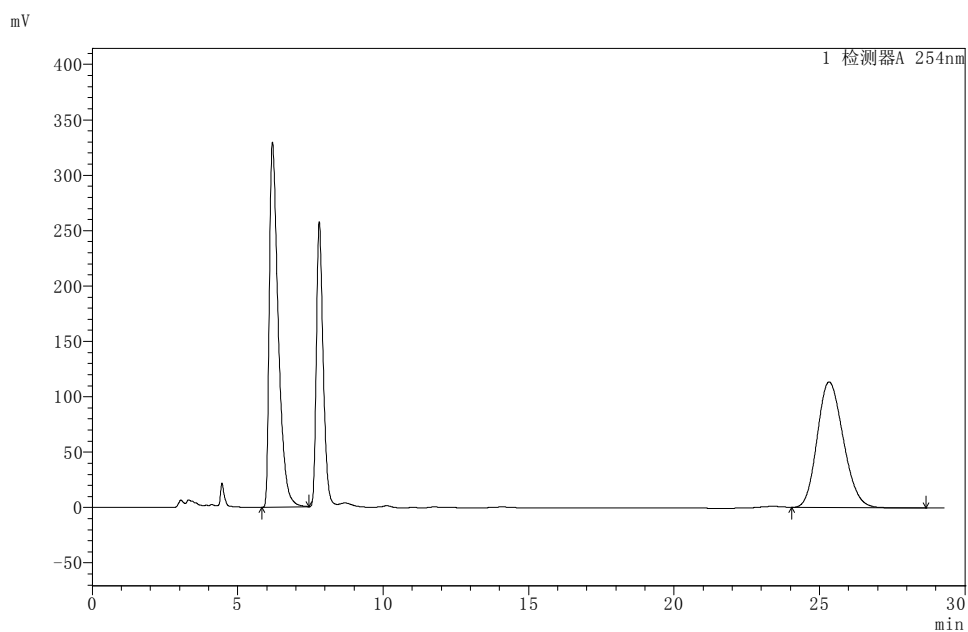

|       | Retention time | Area     | Height | Area%   |
|-------|----------------|----------|--------|---------|
| 1     | 6.199          | 7046497  | 329341 | 49.894  |
| 2     | 25.333         | 7076553  | 113497 | 50.106  |
| Total |                | 14123049 | 442838 | 100.000 |

**4i**

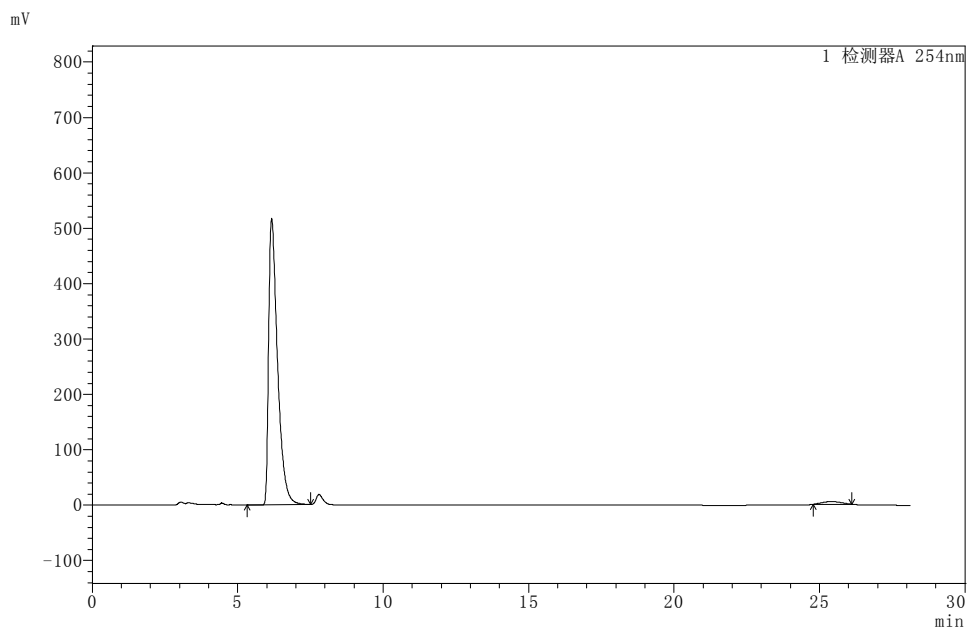

|       | Retention time | Area     | Height | Area%   |
|-------|----------------|----------|--------|---------|
| 1     | 6.170          | 10975630 | 517856 | 98.026  |
| 2     | 25.414         | 221055   | 4798   | 1.974   |
| Total |                | 11196685 | 522654 | 100.000 |

### 4j-racemic

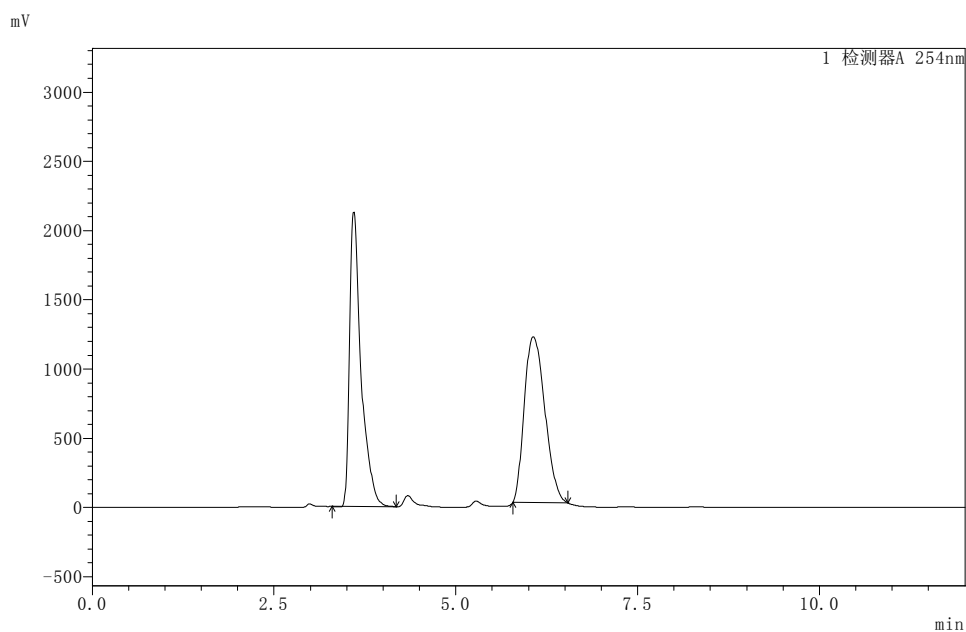

|       | Retention time | Area     | Height  | Area%   |
|-------|----------------|----------|---------|---------|
| 1     | 3.596          | 23433187 | 2126002 | 49.802  |
| 2     | 6.065          | 23619604 | 1198254 | 50.198  |
| Total |                | 47052790 | 3324257 | 100.000 |

### 4j

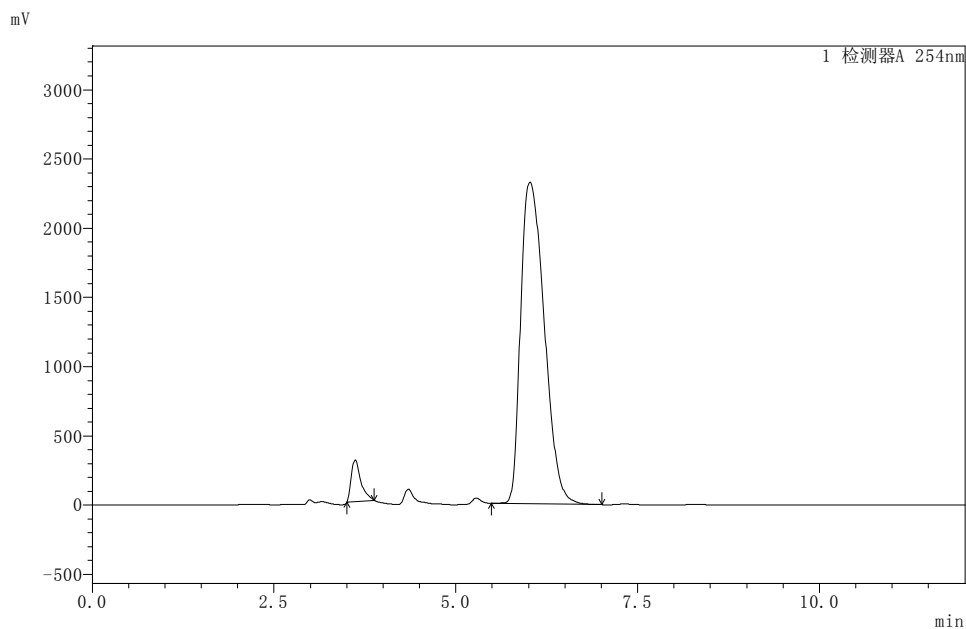

|       | Retention time | Area     | Height  | Area%   |
|-------|----------------|----------|---------|---------|
| 1     | 3.615          | 2762783  | 301024  | 4.997   |
| 2     | 6.018          | 52521941 | 2324327 | 95.003  |
| Total |                | 55284724 | 2625351 | 100.000 |

**4k-racemic**

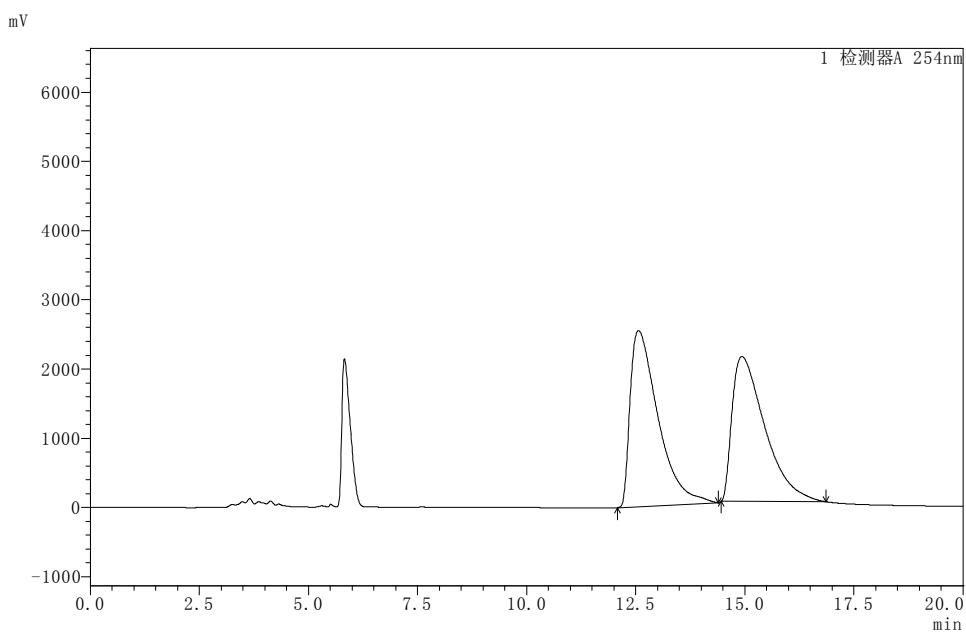

|       | Retention time | Area      | Height  | Area%   |
|-------|----------------|-----------|---------|---------|
| 1     | 12.567         | 113256761 | 2544949 | 50.847  |
| 2     | 14.937         | 109481558 | 2094785 | 49.153  |
| Total |                | 222738319 | 4639734 | 100.000 |

**4k**

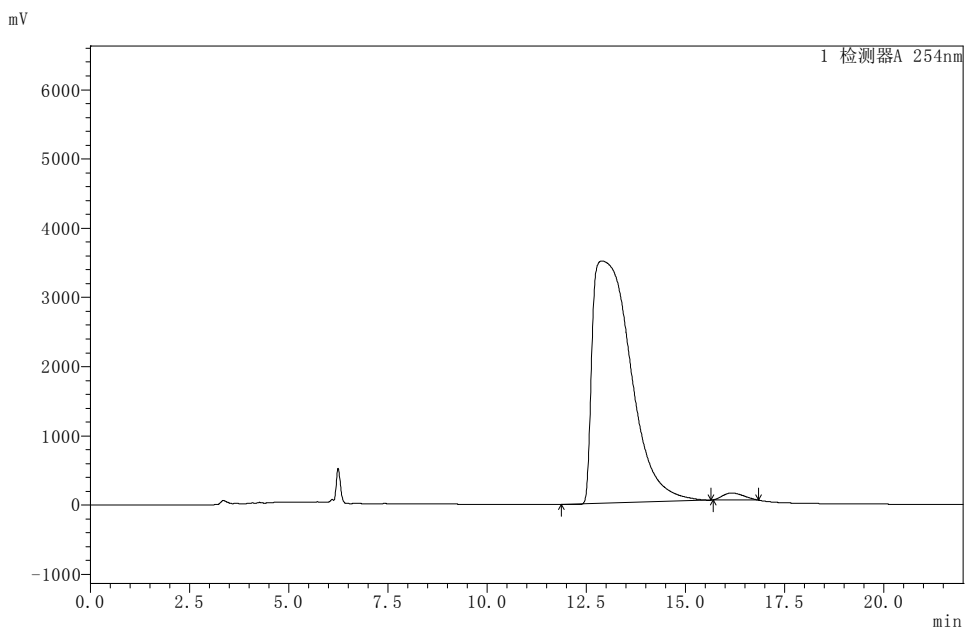

|       | Retention time | Area      | Height  | Area%   |
|-------|----------------|-----------|---------|---------|
| 1     | 12.901         | 235634327 | 3498405 | 98.534  |
| 2     | 16.177         | 3505799   | 101469  | 1.466   |
| Total |                | 239140126 | 3599873 | 100.000 |

**4I-racemic**

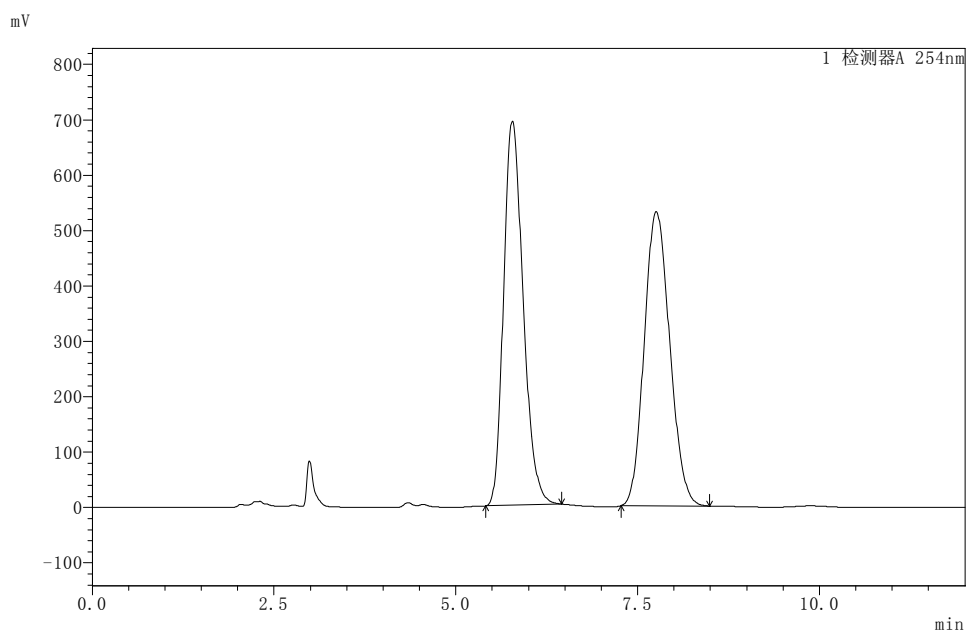

|       | Retention time | Area     | Height  | Area%   |
|-------|----------------|----------|---------|---------|
| 1     | 5.777          | 12981475 | 693659  | 50.039  |
| 2     | 7.756          | 12961362 | 531443  | 49.961  |
| Total |                | 25942837 | 1225102 | 100.000 |

**4I**

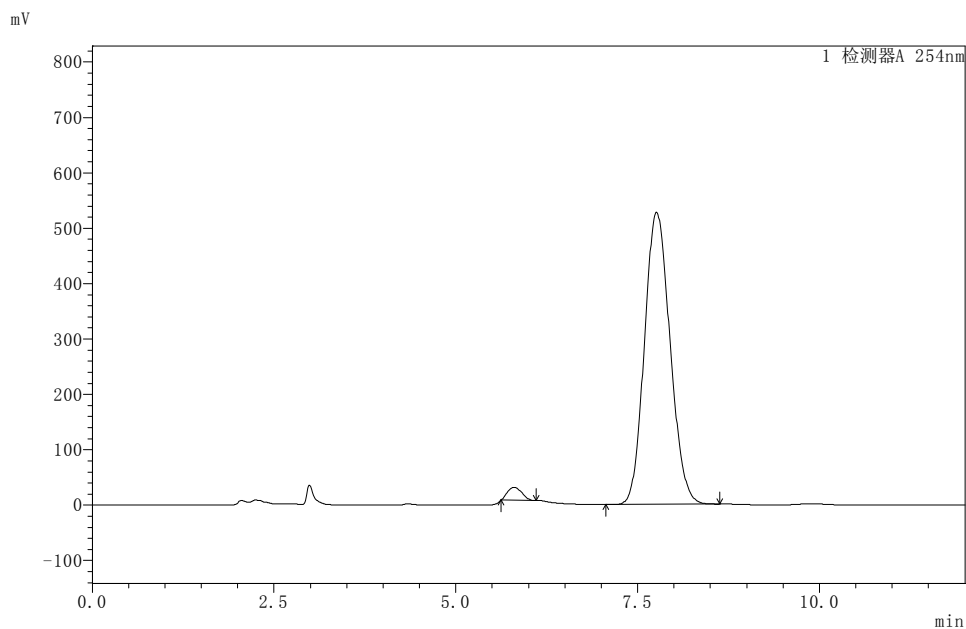

|       | Retention time | Area     | Height | Area%   |
|-------|----------------|----------|--------|---------|
| 1     | 5.801          | 316336   | 23211  | 2.388   |
| 2     | 7.760          | 12931066 | 527665 | 97.612  |
| Total |                | 13247403 | 550876 | 100.000 |

### 4m-racemic

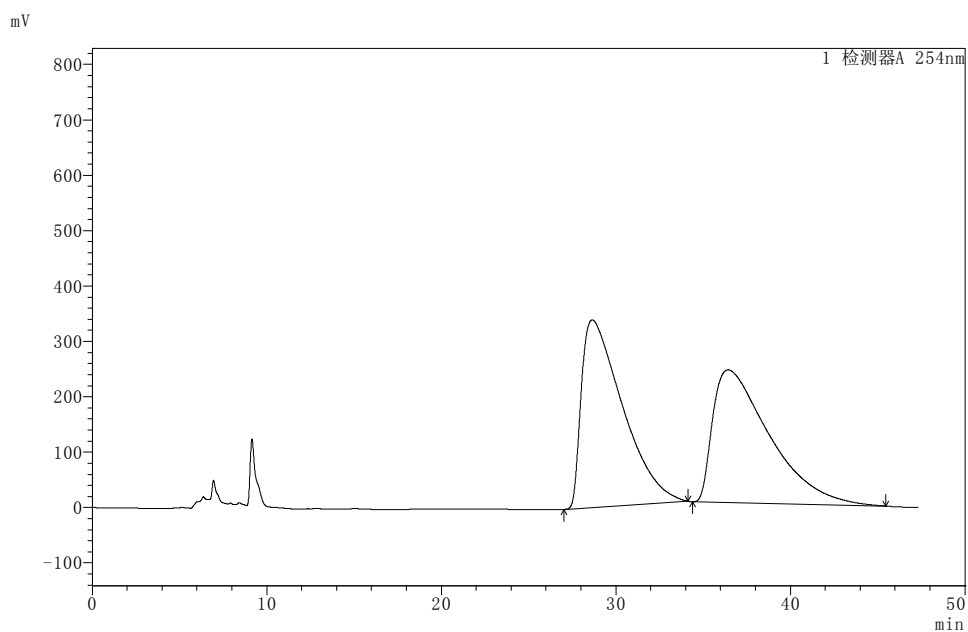

|       | Retention time | Area      | Height | Area%   |
|-------|----------------|-----------|--------|---------|
| 1     | 28.647         | 55578097  | 338980 | 50.587  |
| 2     | 36.438         | 54287287  | 239694 | 49.413  |
| Total |                | 109865384 | 578674 | 100.000 |

### 4m

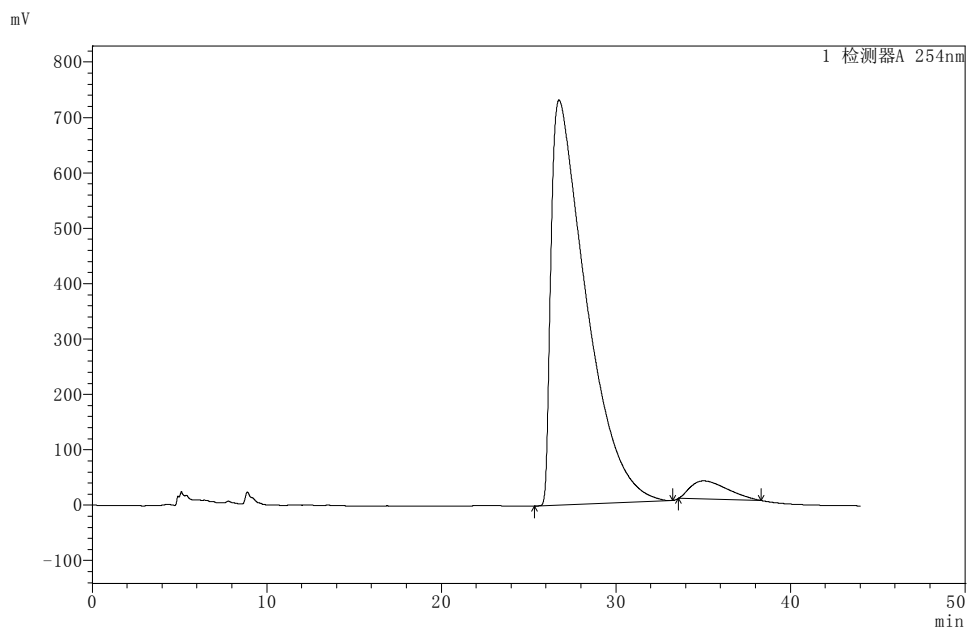

|       | Retention time | Area      | Height | Area%   |
|-------|----------------|-----------|--------|---------|
| 1     | 26.748         | 102633981 | 731241 | 95.547  |
| 2     | 35.032         | 4783628   | 32739  | 4.453   |
| Total |                | 107417609 | 763980 | 100.000 |



**4n-racemic**

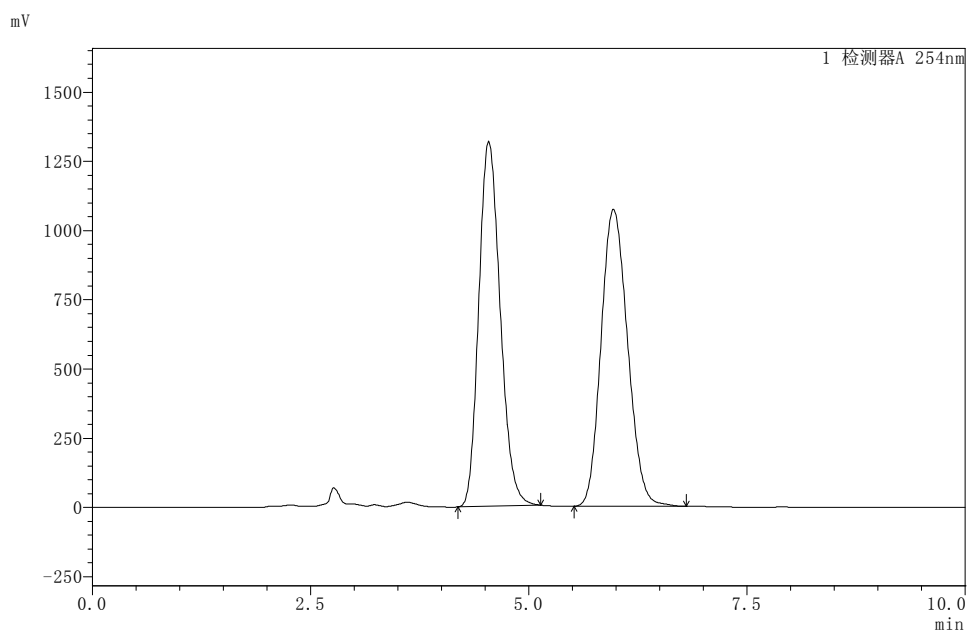

|       | Retention time | Area     | Height  | Area%   |
|-------|----------------|----------|---------|---------|
| 1     | 4.543          | 22495179 | 1318303 | 49.757  |
| 2     | 5.972          | 22715102 | 1072257 | 50.243  |
| Total |                | 45210281 | 2390560 | 100.000 |

**4n**

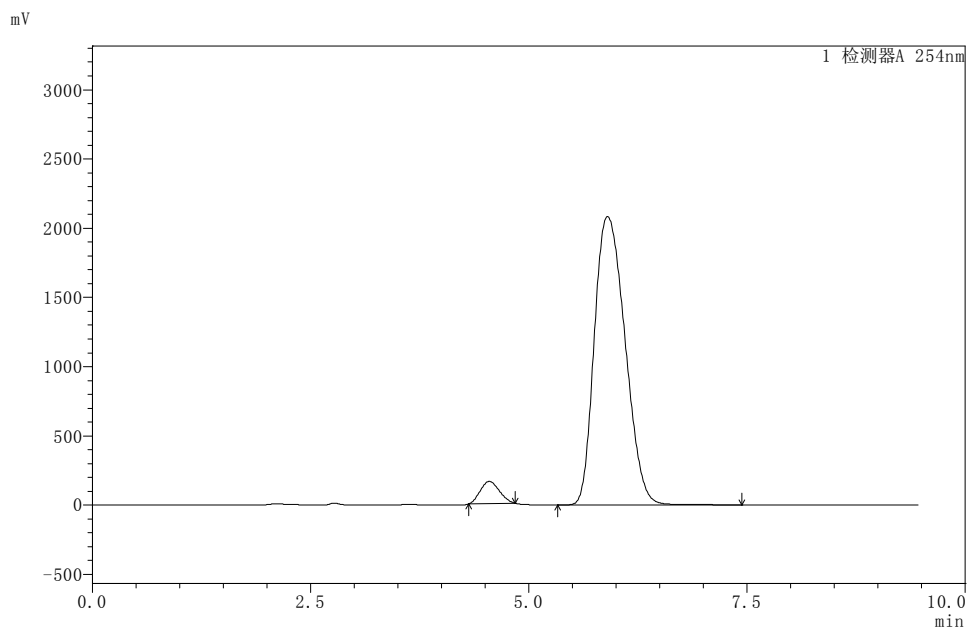

|       | Retention time | Area     | Height  | Area%   |
|-------|----------------|----------|---------|---------|
| 1     | 4.550          | 2497273  | 160426  | 4.467   |
| 2     | 5.905          | 50975815 | 2084326 | 95.533  |
| Total |                | 53473088 | 2244752 | 100.000 |

### 4o-racemic

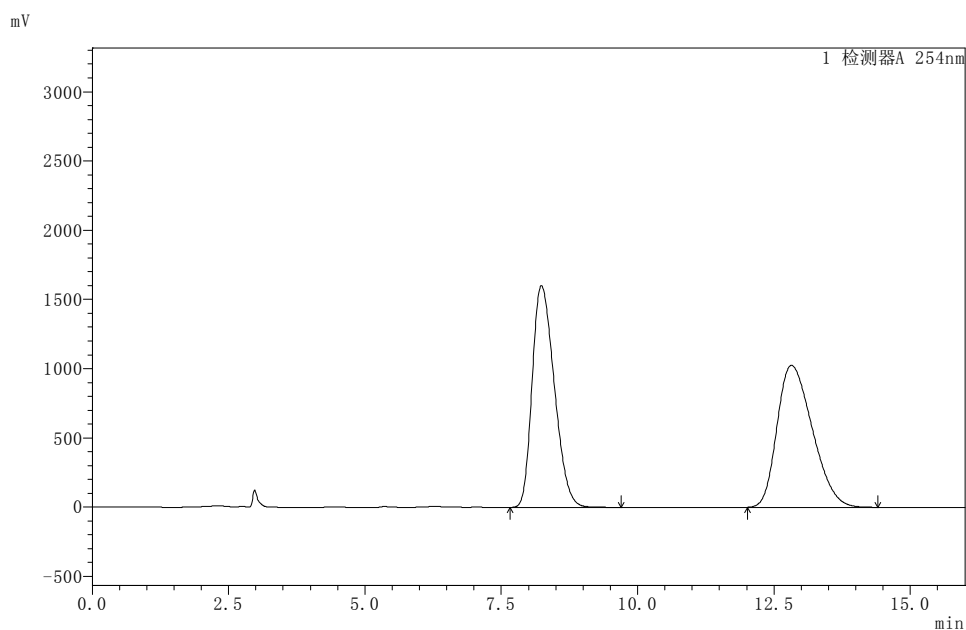

|       | Retention time | Area     | Height  | Area%   |
|-------|----------------|----------|---------|---------|
| 1     | 8.236          | 45363245 | 1601737 | 49.585  |
| 2     | 12.822         | 46122249 | 1025398 | 50.415  |
| Total |                | 91485494 | 2627135 | 100.000 |

### 4o

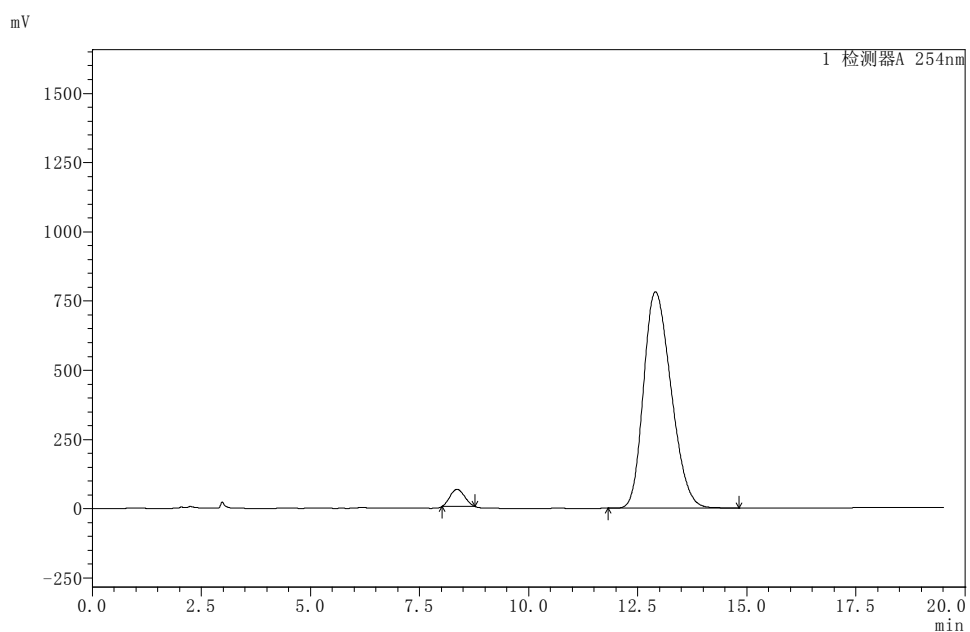

|       | Retention time | Area     | Height | Area%   |
|-------|----------------|----------|--------|---------|
| 1     | 8.361          | 1416619  | 61655  | 3.962   |
| 2     | 12.908         | 34336086 | 781656 | 96.038  |
| Total |                | 35752705 | 843311 | 100.000 |

### 4p-racemic

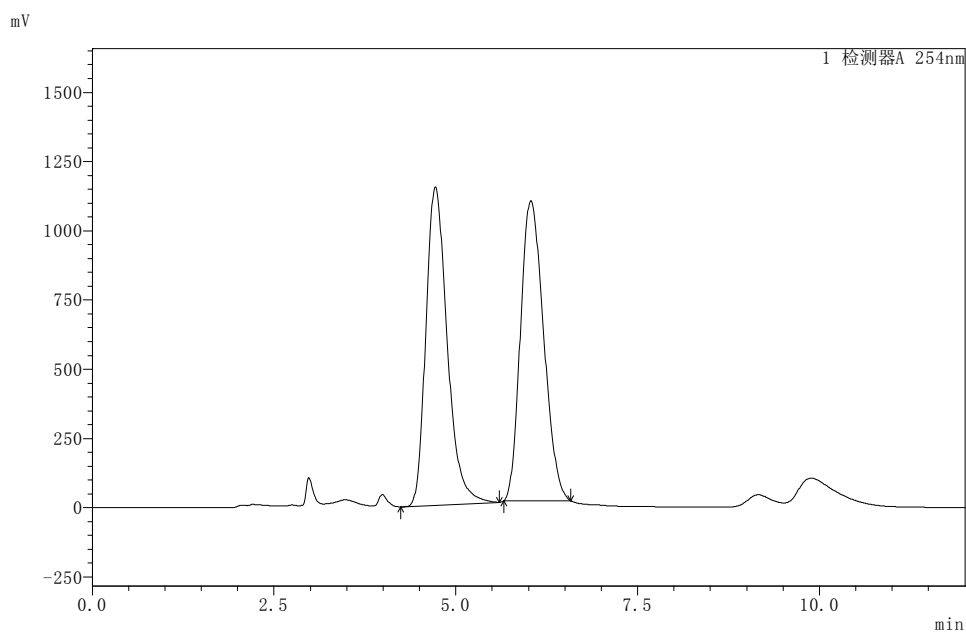

|       | Retention time | Area     | Height  | Area%   |
|-------|----------------|----------|---------|---------|
| 1     | 4.718          | 23461191 | 1150135 | 49.432  |
| 2     | 6.031          | 24000701 | 1083743 | 50.568  |
| Total |                | 47461893 | 2233879 | 100.000 |

### 4p

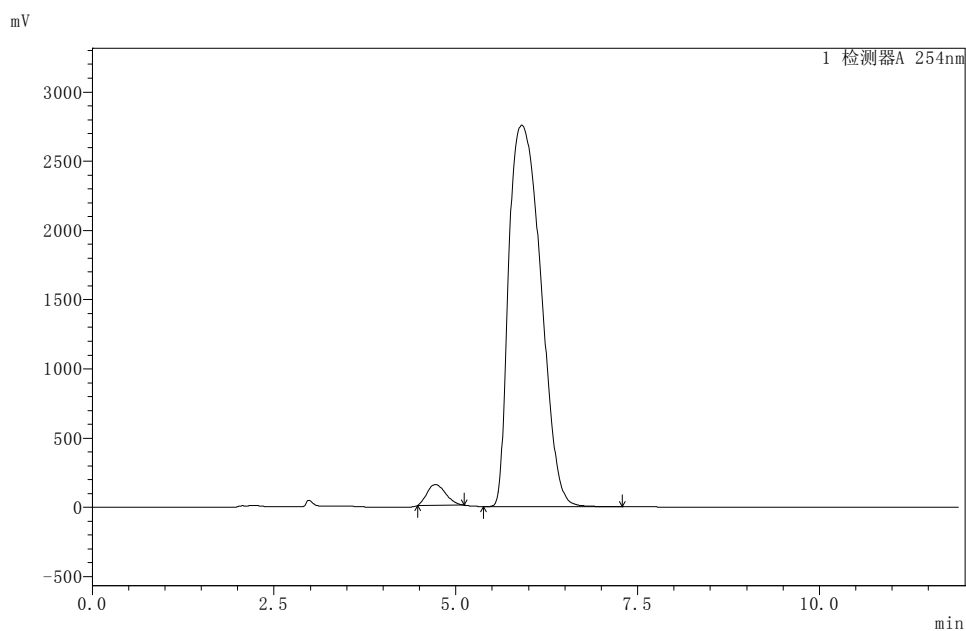

|       | Retention time | Area     | Height  | Area%   |
|-------|----------------|----------|---------|---------|
| 1     | 4.720          | 2594691  | 150195  | 2.990   |
| 2     | 5.907          | 84184284 | 2754902 | 97.010  |
| Total |                | 86778975 | 2905097 | 100.000 |

### 4q-racemic

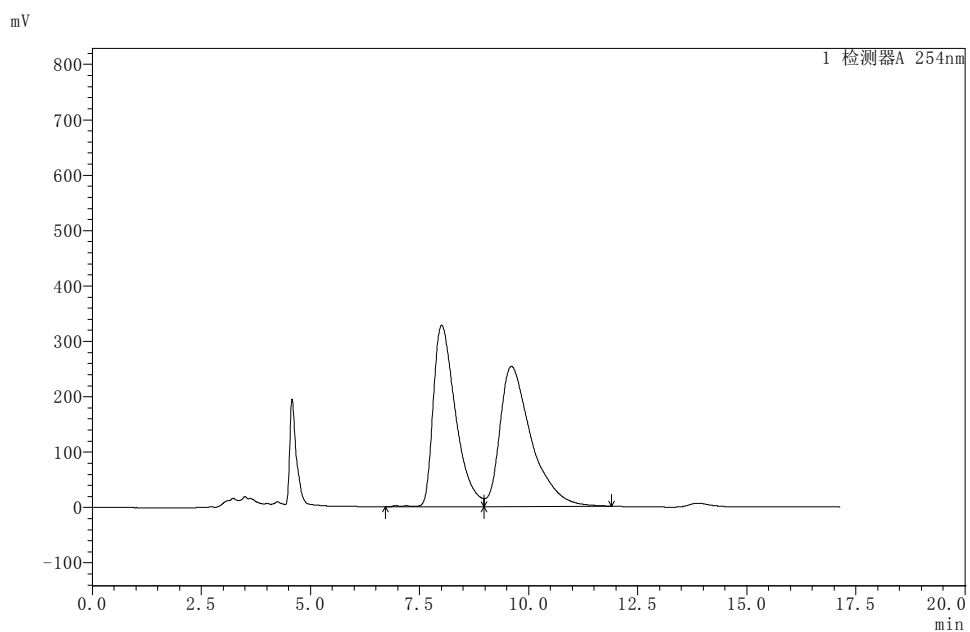

|       | Retention time | Area     | Height | Area%   |
|-------|----------------|----------|--------|---------|
| 1     | 8.009          | 11976614 | 328028 | 49.042  |
| 2     | 9.609          | 12444523 | 253356 | 50.958  |
| Total |                | 24421137 | 581384 | 100.000 |

### 4q

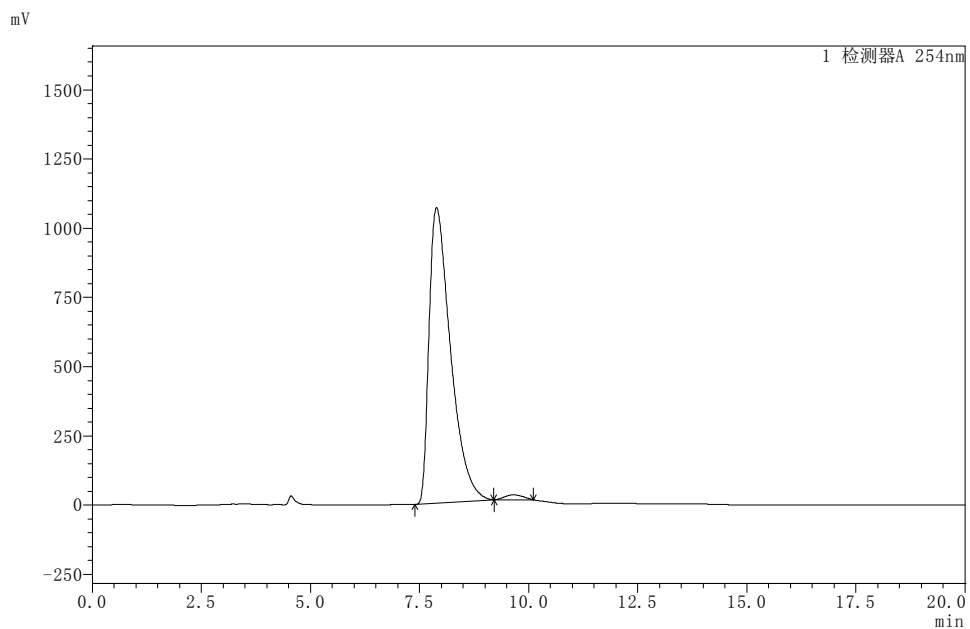

|       | Retention time | Area     | Height  | Area%   |
|-------|----------------|----------|---------|---------|
| 1     | 7.892          | 36552546 | 1068951 | 98.593  |
| 2     | 9.658          | 521455   | 17643   | 1.407   |
| Total |                | 37074001 | 1086593 | 100.000 |

**4r-racemic**

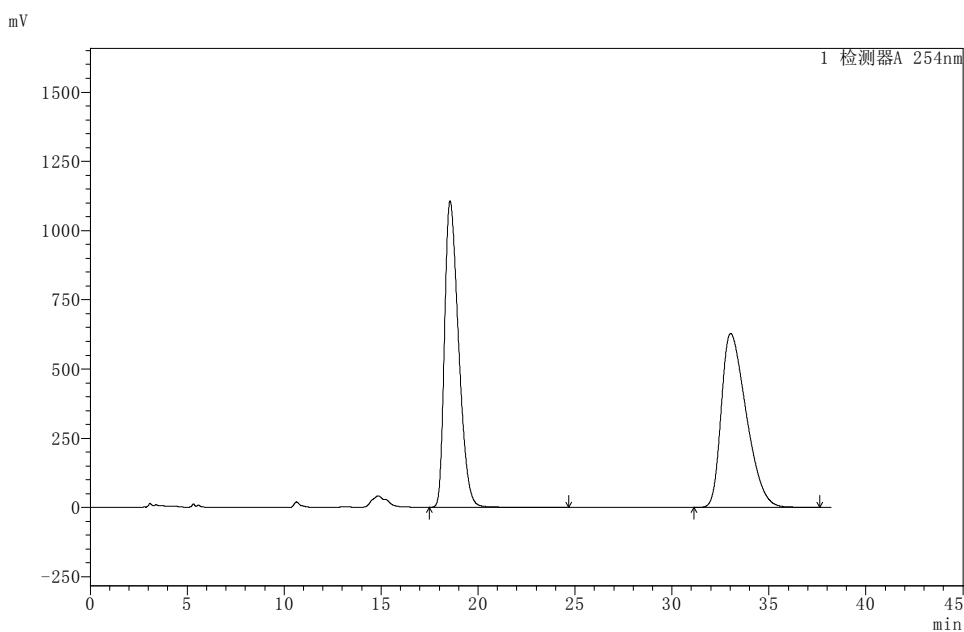

|       | Retention time | Area      | Height  | Area%   |
|-------|----------------|-----------|---------|---------|
| 1     | 18.560         | 55608378  | 1106191 | 49.725  |
| 2     | 33.027         | 56223154  | 627980  | 50.275  |
| Total |                | 111831532 | 1734171 | 100.000 |

**4r**

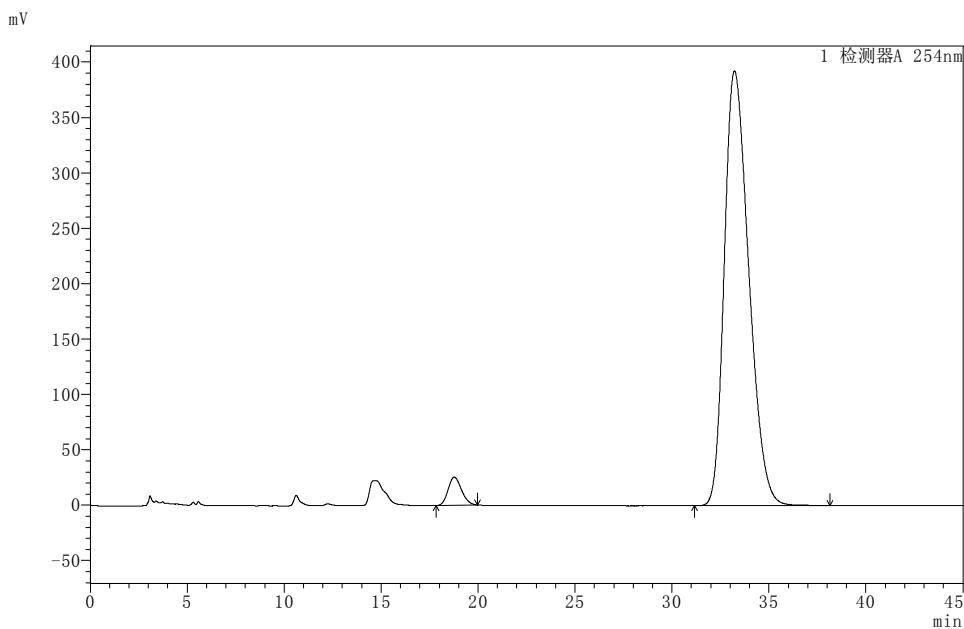

|       | Retention time | Area     | Height | Area%   |
|-------|----------------|----------|--------|---------|
| 1     | 18.777         | 1227599  | 25559  | 3.447   |
| 2     | 33.223         | 34385877 | 392549 | 96.553  |
| Total |                | 35613476 | 418108 | 100.000 |

**4s-racemic**

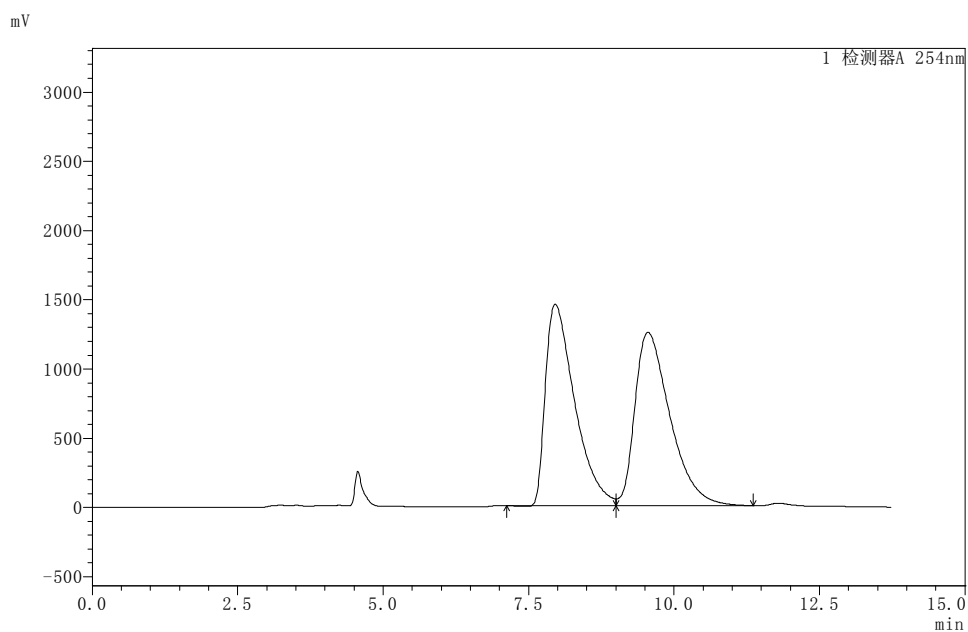

|       | Retention time | Area      | Height  | Area%   |
|-------|----------------|-----------|---------|---------|
| 1     | 7.959          | 51012797  | 1456167 | 49.154  |
| 2     | 9.553          | 52769208  | 1253153 | 50.846  |
| Total |                | 103782004 | 2709320 | 100.000 |

**4s**

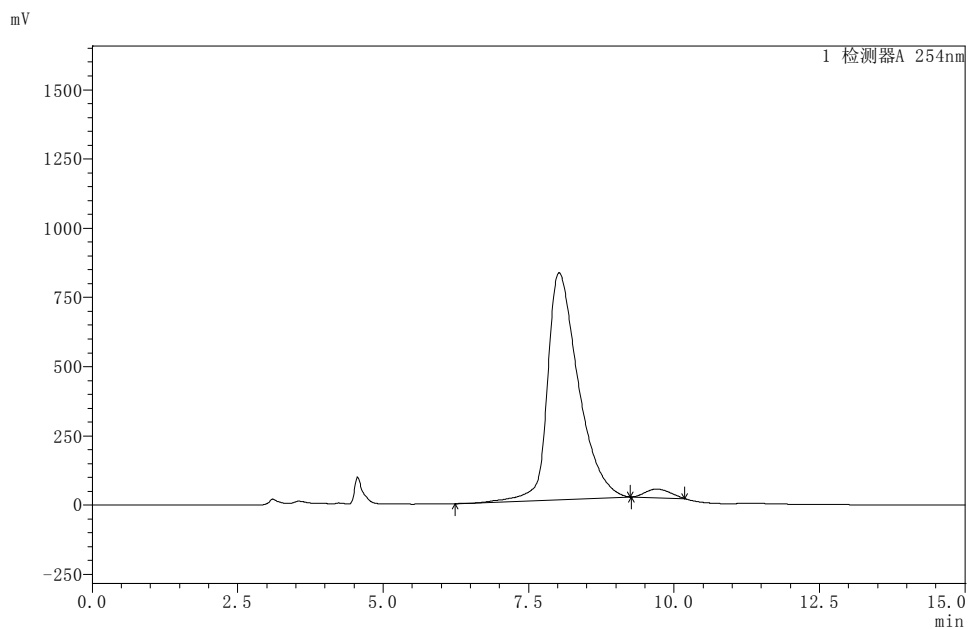

|       | Retention time | Area     | Height | Area%   |
|-------|----------------|----------|--------|---------|
| 1     | 8.026          | 30229458 | 819798 | 97.050  |
| 2     | 9.705          | 918969   | 31134  | 2.950   |
| Total |                | 31148427 | 850932 | 100.000 |

### 4t-racemic

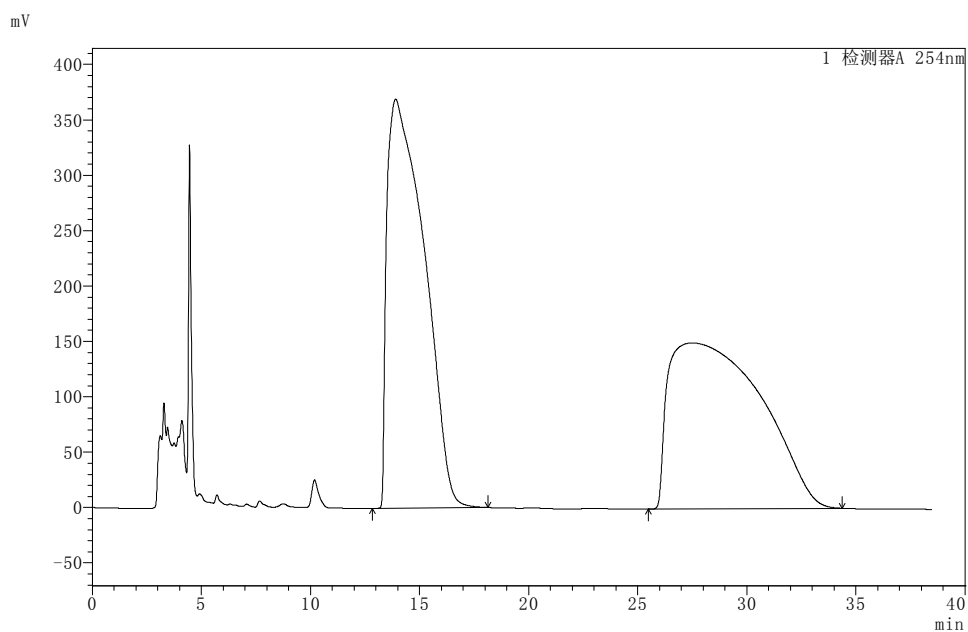

|       | Retention time | Area     | Height | Area%   |
|-------|----------------|----------|--------|---------|
| 1     | 13.912         | 43791001 | 369173 | 49.513  |
| 2     | 27.514         | 44652812 | 149804 | 50.487  |
| Total |                | 88443813 | 518977 | 100.000 |

### 4t

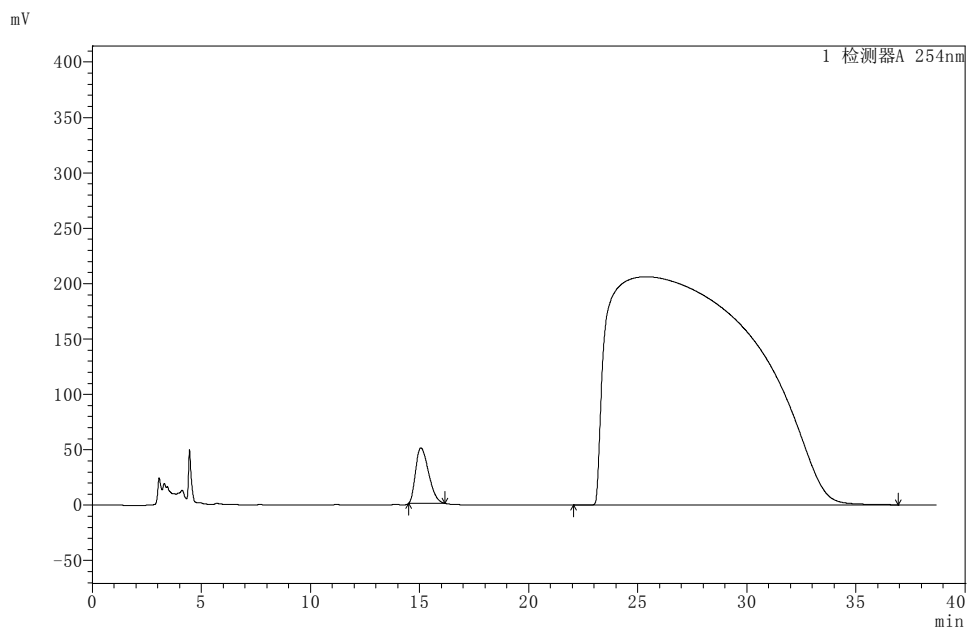

|       | Retention time | Area     | Height | Area%   |
|-------|----------------|----------|--------|---------|
| 1     | 15.069         | 1973486  | 50088  | 1.997   |
| 2     | 25.384         | 96849093 | 206126 | 98.003  |
| Total |                | 98822579 | 256214 | 100.000 |

**4u-racemic**

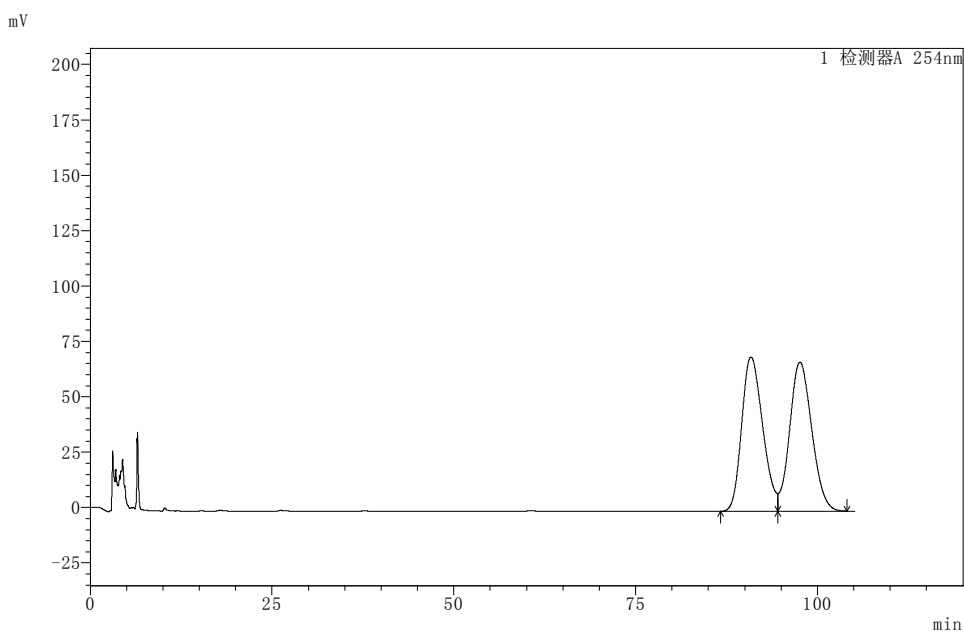

|       | Retention time | Area     | Height | Area%   |
|-------|----------------|----------|--------|---------|
| 1     | 90.870         | 13976110 | 69652  | 49.523  |
| 2     | 97.608         | 14245505 | 67289  | 50.477  |
| Total |                | 28221615 | 136941 | 100.000 |

**4u**

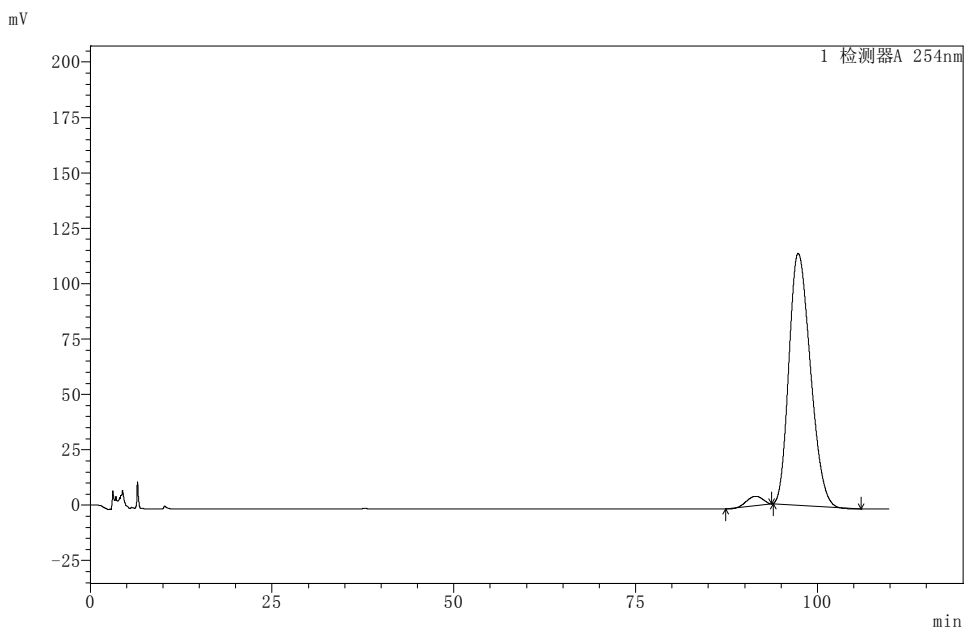

|       | Retention time | Area     | Height | Area%   |
|-------|----------------|----------|--------|---------|
| 1     | 91.475         | 572746   | 4290   | 2.394   |
| 2     | 97.354         | 23350011 | 113635 | 97.606  |
| Total |                | 23922757 | 117925 | 100.000 |



**4v-racemic**

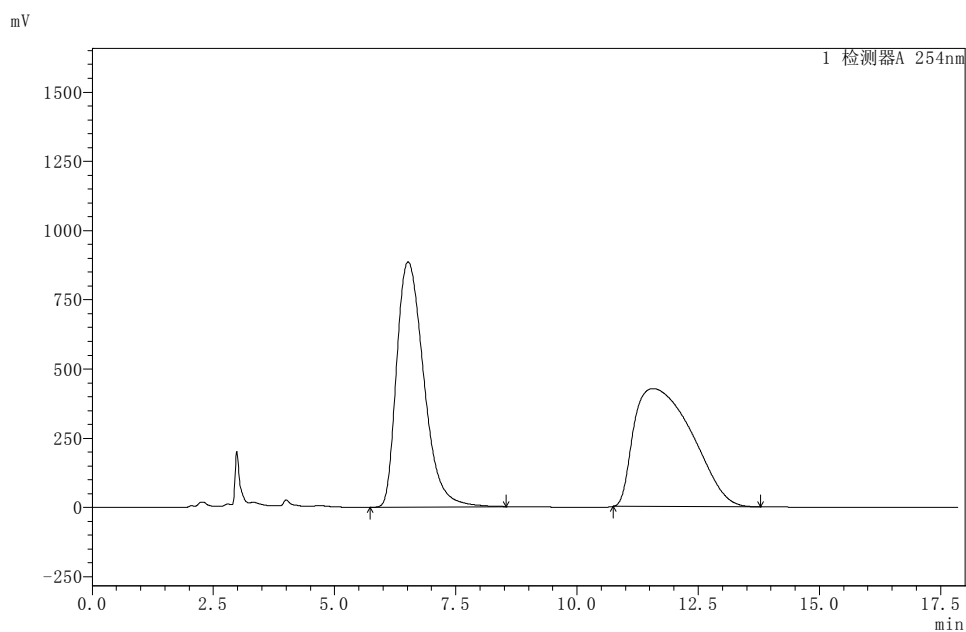

|       | Retention time | Area     | Height  | Area%   |
|-------|----------------|----------|---------|---------|
| 1     | 6.516          | 34485065 | 885477  | 49.177  |
| 2     | 11.566         | 35639223 | 425966  | 50.823  |
| Total |                | 70124288 | 1311442 | 100.000 |

**4v**

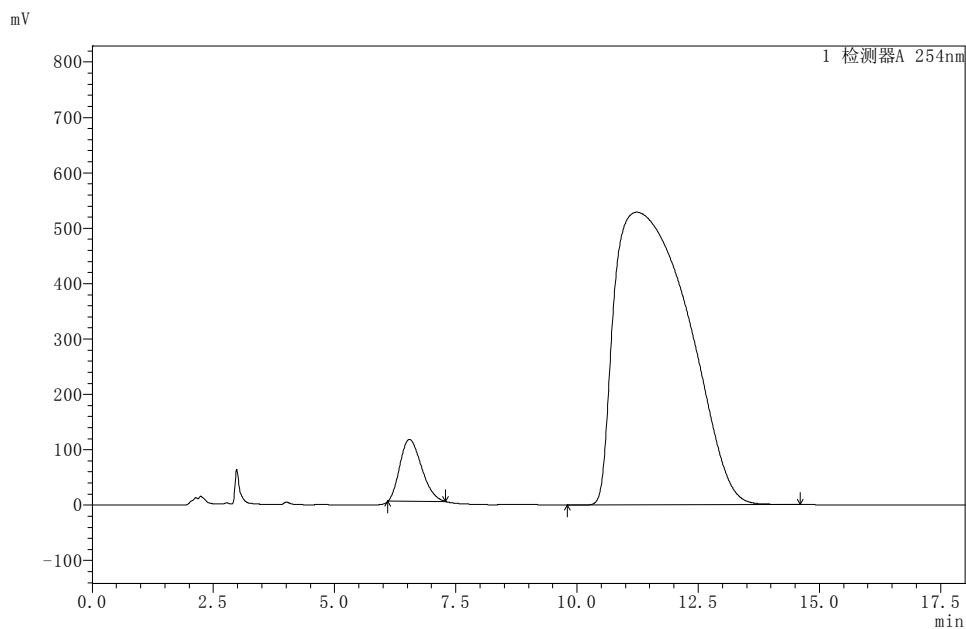

|       | Retention time | Area     | Height | Area%   |
|-------|----------------|----------|--------|---------|
| 1     | 6.544          | 2878554  | 111826 | 4.833   |
| 2     | 11.234         | 56685979 | 528284 | 95.167  |
| Total |                | 59564533 | 640110 | 100.000 |

**4w-racemic**

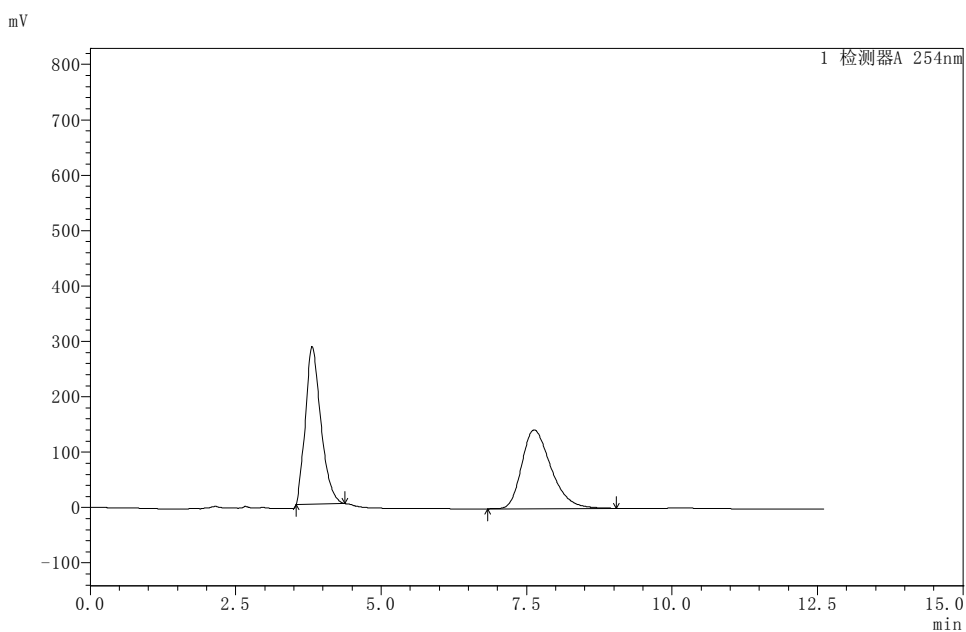

|       | Retention time | Area     | Height | Area%   |
|-------|----------------|----------|--------|---------|
| 1     | 3.814          | 5188732  | 284902 | 50.512  |
| 2     | 7.631          | 5083544  | 142152 | 49.488  |
| Total |                | 10272276 | 427055 | 100.000 |

**4w**

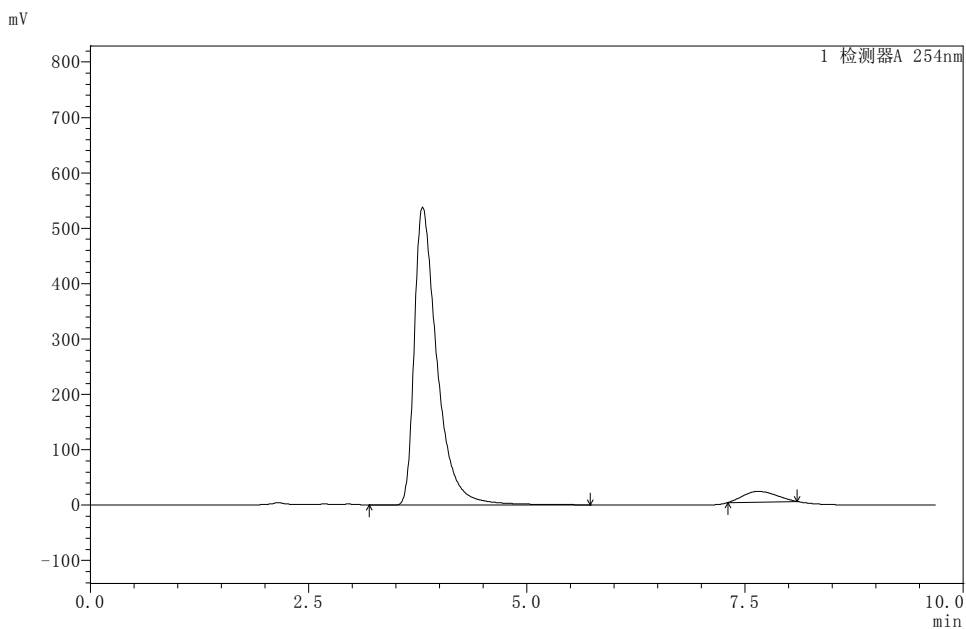

|       | Retention time | Area     | Height | Area%   |
|-------|----------------|----------|--------|---------|
| 1     | 3.809          | 9714409  | 537609 | 95.028  |
| 2     | 7.660          | 508262   | 19173  | 4.972   |
| Total |                | 10222671 | 556782 | 100.000 |
